# Supplementary material
Source: PubMed Central journal article supplement (PMC4154596)
Supplement: NIHMS606442-supplement-1.pdf [file NIHMS606442-supplement-1.pdf]

**Table S1. Significant N>R Correlations with Performance Using a Left Hippocampal Seed**

| <i>Clinical/Cognitive Measure</i> | <i>Cluster Size</i> | <i>Peak T-statistic</i> | <i>Peak X,Y,Z</i> | <i>Region</i>               |
|-----------------------------------|---------------------|-------------------------|-------------------|-----------------------------|
| <i>ADAS-Cog Del. Recall</i>       |                     |                         |                   |                             |
|                                   | 176                 | 4.01                    | 60,2,-34          | R. Inferior Temporal Gyrus  |
|                                   |                     | 3.64                    | 52,2,-30          | R. Middle Temporal Gyrus    |
|                                   |                     | 2.83                    | 52,4,-40          | R. Inferior Temporal Gyrus  |
|                                   | 324                 | 3.76                    | -50,-18,26        | L. Postcentral Gyrus        |
|                                   |                     | 3.57                    | -48,-28,30        | L. Supramarginal Gyrus      |
|                                   | 191                 | 3.26                    | 4,-40,32          | R. Middle Cingulate Cortex  |
|                                   |                     | 3.11                    | 6,-24,34          | R. Middle Cingulate Cortex  |
|                                   |                     | 2.91                    | 4,-32,36          | R. Middle Cingulate Cortex  |
|                                   |                     | 2.80                    | 2,-6,32           | R. Middle Cingulate Cortex  |
| <i>ADAS-Cog Recog.</i>            |                     |                         |                   |                             |
|                                   | 208                 | 5.00                    | -42,-64,22        | L. Middle Temporal Gyrus    |
|                                   | 189                 | 4.26                    | -44,-32,-16       | L. Inferior Temporal Gyrus  |
|                                   |                     | 3.73                    | -54,-6,-30        | L. Inferior Temporal Gyrus  |
|                                   |                     | 3.47                    | -38,-22,-24       | L. Inferior Temporal Gyrus  |
|                                   |                     | 3.46                    | -46,-10,-44       | L. Inferior Temporal Gyrus  |
|                                   |                     | 3.35                    | -46,-24,-14       | L. Middle Temporal Gyrus    |
|                                   |                     | 3.16                    | -52,-10,-22       | L. Middle Temporal Gyrus    |
|                                   |                     | 3.06                    | -44,-16,-24       | L. Inferior Temporal Gyrus  |
|                                   |                     | 3.00                    | -54,-22,-10       | L. Middle Temporal Gyrus    |
|                                   |                     | 3.00                    | -54,-4,-40        | L. Inferior Temporal Gyrus  |
|                                   | 361                 | 4.14                    | -62,-40,22        | L. Superior Temporal Gyrus  |
|                                   |                     | 4.06                    | -42,-42,18        | L. Superior Temporal Gyrus  |
|                                   |                     | 2.57                    | -50,-26,22        | L. Supramarginal Gyrus      |
|                                   | 351                 | 3.99                    | -20,-52,44        | L. Superior Parietal Lobule |
|                                   |                     | 3.82                    | -28,-62,46        | L. Superior Parietal Lobule |
|                                   |                     | 3.00                    | -34,-64,52        | L. Superior Parietal Lobule |
|                                   |                     | 2.68                    | -26,-46,58        | L. Superior Parietal Lobule |
| <i>FCSRT Free Recall</i>          |                     |                         |                   |                             |
|                                   | 286                 | 4.65                    | 56,2,-36          | R. Inferior Temporal Gyrus  |
|                                   |                     | 4.45                    | 46,-6,-26         | R. Inferior Temporal Gyrus  |
|                                   |                     | 2.80                    | 40,-14,-16        | R. Hippocampus              |
|                                   | 484                 | 4.44                    | -48,-24,24        | L. Supramarginal Gyrus      |
|                                   |                     | 3.98                    | -44,-40,10        | L. Superior Temporal Gyrus  |
|                                   | 235                 | 4.09                    | 42,40,36          | R. Middle Frontal Gyrus     |
|                                   |                     | 3.74                    | 46,32,42          | R. Middle Frontal Gyrus     |
|                                   |                     | 3.30                    | 54,32,34          | R. Middle Frontal Gyrus     |
|                                   |                     | 3.22                    | 32,32,52          | R. Middle Frontal Gyrus     |
|                                   |                     | 3.13                    | 38,28,56          | R. Middle Frontal Gyrus     |
|                                   | 301                 | 4.07                    | -52,-4,-32        | L. Inferior Temporal Gyrus  |
|                                   |                     | 3.56                    | -42,0,-28         | L. Middle Temporal Gyrus    |

|            |      |            |                            |                                |
|------------|------|------------|----------------------------|--------------------------------|
|            | 3.34 | -50,0,-44  | L. Inferior Temporal Gyrus |                                |
|            | 3.28 | -50,-8,-42 | L. Inferior Temporal Gyrus |                                |
| <i>FCR</i> |      |            |                            |                                |
|            | 224  | 5.48       | 50,-36,10                  | R. Superior Temporal Gyrus     |
|            | 287  | 5.19       | 14,56,32                   | R. Med. Superior Frontal Gyrus |
|            |      | 4.02       | 8,54,46                    | R. Med. Superior Frontal Gyrus |
|            |      | 3.68       | 12,46,50                   | R. Superior Frontal Gyrus      |
|            | 644  | 4.77       | 34,-80,-36                 | R. Cerebellum                  |
|            |      | 4.47       | 16,-80,-26                 | R. Cerebellum                  |
|            |      | 3.78       | 20,-70,-34                 | R. Cerebellum                  |
|            |      | 3.72       | 44,-68,-40                 | R. Cerebellum                  |
|            |      | 3.51       | 14,-66,-28                 | R. Cerebellum                  |
|            |      | 3.11       | 36,-66,-48                 | R. Cerebellum                  |
|            |      | 2.81       | 18,-84,-36                 | R. Cerebellum                  |
|            |      | 2.66       | 28,-82,-48                 | R. Cerebellum                  |
|            | 285  | 4.49       | -12,-6,-18                 | L. Parahippocampal Gyrus       |
|            |      | 3.07       | -8,-4,-30                  | L. Parahippocampal Gyrus       |
|            | 266  | 4.15       | -22,-70,-50                | L. Cerebellum                  |
|            |      | 4.03       | -24,-66,-42                | L. Cerebellum                  |
|            |      | 3.84       | 6,-70,-54                  | R. Cerebellum                  |
|            |      | 3.40       | 2,-78,-46                  | R. Cerebellum                  |
|            |      | 3.13       | -8,-72,-52                 | L. Cerebellum                  |
|            |      | 2.92       | -10,-62,-56                | L. Cerebellum                  |
|            |      | 2.74       | -34,-66,-44                | L. Cerebellum                  |
|            | 322  | 3.49       | -28,-8,-36                 | L. Fusiform Gyrus              |
|            |      | 3.40       | -28,2,-38                  | L. Fusiform Gyrus              |
|            |      | 3.35       | -36,10,-18                 | L. Superior Temporal Pole      |
|            |      | 3.24       | -42,-2,-20                 | L. Superior Temporal Pole      |
|            |      | 3.03       | -34,10,-30                 | L. Superior Temporal Pole      |
|            |      | 2.91       | -42,16,-32                 | L. Middle Temporal Pole        |

*CDR-sb*

|     |      |           |                            |
|-----|------|-----------|----------------------------|
| 179 | 3.99 | 10,-36,32 | R. Middle Cingulate Cortex |
|-----|------|-----------|----------------------------|

---

ADAS-Cog Del., ADAS-Cog Delayed Recall Score; ADAS-Cog Recog., ADAS-Cog Recognition Score; FCSRT Free Recall, Free-Cued and Selective Reminding Test Free Recall Score; FCSRT Total, Free-Cued and Selective Reminding Test Total Score; FR, Post-scan Free Recall; FCR, Post-scan Forced-Choice Recognition; CDR-sb, CDR Sum-of-Boxes; MMSE, Mini-Mental State Examination; Med., Medial; R., Right; L., Left

---

**Table S2. Significant R>N Correlations with Performance Using a Left Hippocampal Seed**

| <i>Clinical/Cognitive Measure</i> | <i>Cluster Size</i>      | <i>Peak T-statistic</i> | <i>Peak X,Y,Z</i> | <i>Region</i>                            |                                          |
|-----------------------------------|--------------------------|-------------------------|-------------------|------------------------------------------|------------------------------------------|
| <i>ADAS-Cog Recog.</i>            | 239                      | 4.23                    | 46,16,-34         | R. Middle Temporal Pole                  |                                          |
|                                   |                          | 3.61                    | 40,20,-46         | R. Middle Temporal Pole                  |                                          |
|                                   |                          | 3.42                    | 30,18,-22         | R. Inferior Frontal Gyrus - orbital part |                                          |
|                                   | 194                      | 2.66                    | 32,20,-34         | R. Middle Temporal Pole                  |                                          |
|                                   |                          | 4.15                    | -34,6,-34         | L. Middle Temporal Pole                  |                                          |
|                                   |                          | 2.73                    | -32,12,-24        | L. Superior Temporal Pole                |                                          |
|                                   | 729                      | 3.97                    | 12,-20,-34        | Brainstem                                |                                          |
|                                   |                          | 3.86                    | 18,-18,-20        | R. Parahippocampal Gyrus                 |                                          |
|                                   |                          | 3.73                    | 6,-12,-36         | Brainstem                                |                                          |
|                                   |                          | 3.70                    | 18,-30,-18        | R. Parahippocampal Gyrus                 |                                          |
|                                   |                          | 3.70                    | 2,-6,-30          | Anterior of Brainstem                    |                                          |
|                                   |                          | 3.66                    | 8,-28,-38         | Brainstem                                |                                          |
|                                   |                          | 3.65                    | -14,-32,-32       | L. Cerebellum                            |                                          |
|                                   |                          | 3.52                    | 16,-14,-38        | Anterior of Brainstem                    |                                          |
|                                   |                          | 3.16                    | -8,-22,-38        | Brainstem                                |                                          |
|                                   |                          | 3.12                    | 26,-8,-16         | R. Hippocampus                           |                                          |
|                                   |                          | 3.00                    | 20,-10,-24        | R. Parahippocampal Gyrus                 |                                          |
|                                   |                          | 233                     | 3.92              | 26,-50,-54                               | R. Cerebellum                            |
|                                   | 3.37                     |                         | 16,-40,-42        | R. Cerebellum                            |                                          |
|                                   | 226                      | 3.76                    | 26,44,-10         | R. Middle Frontal Gyrus - orbital part   |                                          |
|                                   |                          | 3.31                    | 28,24,-6          | R. Insula                                |                                          |
|                                   | <i>FCSRT Free Recall</i> | 1356                    | 5.06              | 18,62,-6                                 | R. Superior Frontal Gyrus - orbital part |
|                                   |                          |                         | 4.76              | 12,64,-12                                | R. Middle Frontal Gyrus - orbital part   |
| 4.42                              |                          |                         | -16,28,-8         | L. Gyrus Rectus                          |                                          |
| 4.33                              |                          |                         | 24,14,-24         | R. Inferior Frontal Gyrus - orbital part |                                          |
| 4.26                              |                          |                         | 14,52,-6          | R. Middle Frontal Gyrus - orbital part   |                                          |
| 4.19                              |                          |                         | -20,58,-8         | L. Superior Frontal Gyrus - orbital part |                                          |
| 4.12                              |                          |                         | 24,56,-18         | R. Middle Frontal Gyrus - orbital part   |                                          |
| 3.98                              |                          |                         | -18,40,-8         | L. Superior Frontal Gyrus - orbital part |                                          |
| 3.70                              |                          |                         | 26,60,-8          | R. Superior Frontal Gyrus - orbital part |                                          |
| 3.23                              |                          |                         | 28,30,-20         | R. Inferior Frontal Gyrus - orbital part |                                          |
| 3.22                              |                          |                         | 36,56,-16         | R. Middle Frontal Gyrus - orbital part   |                                          |
| 3.07                              |                          |                         | 32,22,-30         | R. Superior Temporal Pole                |                                          |
| 3.03                              |                          |                         | 18,36,-6          | R. Middle Frontal Gyrus - orbital part   |                                          |
| 3.03                              |                          |                         | -8,50,0           | L. Anterior Cingulate Cortex             |                                          |
| 2.90                              |                          |                         | 26,46,-14         | R. Middle Frontal Gyrus - orbital part   |                                          |
| 2.89                              |                          |                         | 24,38,-12         | R. Superior Frontal Gyrus - orbital part |                                          |
| <i>FCSRT Total</i>                |                          |                         | 221               | 5.79                                     | 40,16,-38                                |
|                                   | 3.58                     | 30,18,-44               |                   | R. Fusiform Gyrus                        |                                          |
|                                   | 403                      | 4.39                    | 18,-20,-22        | R. Parahippocampal Gyrus                 |                                          |
|                                   |                          | 4.02                    | 10,-20,-34        | Brainstem                                |                                          |
|                                   |                          | 3.54                    | 30,-6,-28         | R. Parahippocampal Gyrus                 |                                          |
|                                   |                          | 3.21                    | 32,-28,-12        | R. Hippocampus                           |                                          |
|                                   |                          | 3.20                    | 14,-14,-38        | Anterior of Brainstem                    |                                          |
|                                   |                          | 2.77                    | 20,-10,-24        | R. Parahippocampal Gyrus                 |                                          |

|           |     |      |             |                             |
|-----------|-----|------|-------------|-----------------------------|
|           | 180 | 3.94 | -12,-32,-32 | L. Cerebellum               |
|           |     | 3.68 | -8,-22,-38  | Brainstem                   |
|           |     | 2.71 | -16,-20,-22 | L. Parahippocampal Gyrus    |
| <i>FR</i> |     |      |             |                             |
|           | 736 | 4.67 | 32,-42,-20  | R.Fusiform Gyrus            |
|           |     | 4.09 | 54,-52,-12  | R. Inferior Temporal Gyrus  |
|           |     | 3.89 | 46,-46,-20  | R. Inferior Temporal Gyrus  |
|           |     | 3.80 | 64,-24,0    | R. Superior Temporal Gyrus  |
|           |     | 3.61 | 42,-40,-24  | R. Fusiform Gyrus           |
|           |     | 3.10 | 58,-38,-6   | R. Middle Temporal Gyrus    |
|           |     | 2.87 | 72,-24,2    | R. Superior Temporal Gyrus  |
|           | 444 | 4.54 | 12,-52,76   | R. Postcentral Gyrus        |
|           |     | 3.89 | 20,-80,56   | R. Superior Parietal Lobule |
|           |     | 3.73 | 14,-76,52   | R. Superior Parietal Lobule |
|           |     | 3.55 | 14,-42,80   | R. Postcentral Gyrus        |
|           |     | 3.46 | 14,-70,64   | R. Superior Parietal Lobule |
|           |     | 3.25 | 24,-48,68   | R. Superior Parietal Lobule |
|           | 354 | 3.99 | 26,4,-2     | R. Putamen                  |
|           |     | 2.85 | 22,14,4     | R. Putamen                  |
|           | 209 | 3.63 | 30,22,40    | R. Middle Frontal Gyrus     |
|           |     | 2.82 | 24,24,50    | R. Superior Frontal Gyrus   |
|           | 245 | 3.45 | -46,-66,44  | L. Angular Gyrus            |
|           |     | 3.36 | -42,-78,44  | L. Angular Gyrus            |
|           |     | 3.33 | -58,-48,38  | L. Inferior Parietal Gyrus  |
|           |     | 3.23 | -50,-60,40  | L. Angular Gyrus            |

---

ADAS-Cog Del., ADAS-Cog Delayed Recall Score; ADAS-Cog Recog., ADAS-Cog Recognition Score; FCSRT Free Recall, Free-Cued and Selective Reminding Test Free Recall Score; FCSRT Total, Free-Cued and Selective Reminding Test Total Score; FR, Post-scan Free Recall; FCR, Post-scan Forced-Choice Recognition; CDR-sb, CDR Sum-of-Boxes; MMSE, Mini-Mental State Examination; Med., Medial; R., Right; L., Left

---

**Table S3. Significant N>R Correlations with Performance Using a Right Hippocampal Seed**

| <i>Clinical/Cognitive Measure</i> | <i>Cluster Size</i> | <i>Peak T-statistic</i> | <i>Peak X,Y,Z</i> | <i>Region</i>               |                           |
|-----------------------------------|---------------------|-------------------------|-------------------|-----------------------------|---------------------------|
| <i>ADAS-Cog Recall</i>            | 279                 | 4.89                    | 42,-60,38         | R. Angular Gyrus            |                           |
|                                   |                     | 2.75                    | 58,-60,42         | R. Inferior Parietal Lobule |                           |
| <i>FCSRT Free Recall</i>          | 193                 | 5.14                    | -44,-32,24        | L. Supramarginal Gyrus      |                           |
|                                   | 380                 | 4.45                    | 22,-100,4         | R. Superior Occipital Gyrus |                           |
|                                   |                     | 3.74                    | 30,-80,8          | R. Middle Occipital Gyrus   |                           |
|                                   |                     | 3.30                    | 32,-94,8          | R. Middle Occipital Gyrus   |                           |
|                                   | 411                 | 4.25                    | -26,-98,-4        | L. Middle Occipital Gyrus   |                           |
|                                   |                     | 4.14                    | -4,-98,-4         | L. Calcarine Sulcus         |                           |
|                                   |                     | 3.62                    | -12,-98,6         | L. Superior Occipital Gyrus |                           |
|                                   |                     | 3.58                    | -18,-104,18       | L. Superior Occipital Gyrus |                           |
|                                   |                     | 3.40                    | -12,-96,14        | L. Superior Occipital Gyrus |                           |
|                                   |                     | 3.20                    | 4,-100,0          | R. Calcarine Sulcus         |                           |
|                                   |                     | 3.18                    | -18,-98,24        | L. Superior Occipital Gyrus |                           |
|                                   | 211                 | 3.08                    | -14,-88,14        | L. Superior Occipital Gyrus |                           |
|                                   |                     | 4.25                    | 42,-60,34         | R. Angular Gyrus            |                           |
|                                   |                     | 3.45                    | 46,-64,20         | R. Middle Temporal Gyrus    |                           |
|                                   | 205                 | 4.21                    | -22,-86,46        | L. Superior Occipital Gyrus |                           |
|                                   |                     | 4.09                    | -12,-86,38        | L. Cuneus                   |                           |
|                                   |                     | 3.03                    | -28,-88,38        | L. Middle Occipital Gyrus   |                           |
|                                   | <i>FCSRT Total</i>  | 224                     | 6.77              | 42,-62,36                   | R. Angular Gyrus          |
|                                   |                     | 652                     | 5.35              | 24,-98,4                    | R. Middle Occipital Gyrus |
| 4.88                              |                     |                         | 22,-98,-6         | R. Calcarine Sulcus         |                           |
| 4.37                              |                     |                         | 32,-96,10         | R. Middle Occipital Gyrus   |                           |
| 3.90                              |                     |                         | 32,-90,4          | R. Middle Occipital Gyrus   |                           |
| 2.92                              |                     |                         | 18,-96,30         | R. Superior Occipital Gyrus |                           |
| 2.89                              |                     |                         | 20,-96,22         | R. Superior Occipital Gyrus |                           |
| 2.79                              |                     |                         | 34,-94,18         | R. Middle Occipital Gyrus   |                           |
| 807                               |                     | 4.54                    | -18,-100,14       | L. Superior Occipital Gyrus |                           |
|                                   |                     | 4.45                    | -26,-98,-4        | L. Middle Occipital Gyrus   |                           |
|                                   |                     | 4.40                    | -10,-98,-2        | L. Calcarine Sulcus         |                           |
|                                   |                     | 4.37                    | -8,-100,10        | L. Superior Occipital Gyrus |                           |
|                                   |                     | 4.12                    | -36,-88,-4        | L. Middle Occipital Gyrus   |                           |
|                                   |                     | 3.44                    | -18,-98,-6        | L. Calcarine Sulcus         |                           |
|                                   |                     | 3.18                    | -34,-84,12        | L. Middle Occipital Gyrus   |                           |
|                                   | <i>FCR</i>          | 328                     | 5.86              | -42,22,-36                  | L. Middle Temporal Pole   |
| 4.03                              |                     |                         | -36,14,-42        | L. Inferior Temporal Gyrus  |                           |

|      |      |             |                             |
|------|------|-------------|-----------------------------|
|      | 3.87 | -44,8,-50   | L. Middle Temporal Pole     |
|      | 2.92 | -38,14,-20  | L. Superior Temporal Pole   |
|      | 2.83 | -32,18,-34  | L. Middle Temporal Pole     |
| 2104 | 5.45 | 42,-50,-38  | R. Cerebellum               |
|      | 4.83 | 34,-82,-34  | R. Cerebellum               |
|      | 4.76 | 30,-76,-24  | R. Cerebellum               |
|      | 4.71 | 2,-68,-52   | R. Cerebellum               |
|      | 4.21 | 30,-76,-54  | R. Cerebellum               |
|      | 4.12 | 48,-64,-36  | R. Cerebellum               |
|      | 4.05 | -20,-68,-54 | L. Cerebellum               |
|      | 3.98 | 14,-66,-60  | R. Cerebellum               |
|      | 3.83 | -24,-66,-42 | L. Cerebellum               |
|      | 3.71 | 30,-68,-26  | R. Cerebellum               |
|      | 3.59 | -36,-62,-42 | L. Cerebellum               |
|      | 3.55 | 16,-68,-38  | R. Cerebellum               |
|      | 3.51 | 2,-80,-44   | R. Cerebellum               |
|      | 3.47 | 28,-84,-24  | R. Cerebellum               |
|      | 3.45 | 40,-68,-28  | R. Cerebellum               |
|      | 3.33 | -4,-70,-38  | L. Cerebellum               |
|      | 3.32 | 14,-66,-28  | R. Cerebellum               |
|      | 3.31 | 28,-60,-54  | R. Cerebellum               |
|      | 3.28 | 34,-66,-50  | R. Cerebellum               |
|      | 3.17 | 14,-88,-38  | R. Cerebellum               |
|      | 3.15 | 42,-72,-16  | R. Inferior Occipital Gyrus |
|      | 3.13 | 18,-56,-62  | R. Cerebellum               |
|      | 3.12 | 30,-56,-20  | R. Cerebellum               |
|      | 3.10 | 16,-56,-14  | R. Cerebellum               |
|      | 2.96 | 16,-76,-54  | R. Cerebellum               |
|      | 2.88 | 8,-66,-34   | R. Cerebellum               |
|      | 2.70 | -38,-72,-44 | L. Cerebellum               |
|      | 2.67 | -10,-78,-42 | L. Cerebellum               |
| 669  | 4.74 | 4,-96,-2    | L. Calcarine Sulcus         |
|      | 3.98 | 2,-86,-18   | R. Cerebellum               |
|      | 3.79 | 0,-78,-8    | L. Lingual Gyrus            |
|      | 3.65 | -8,-80,-12  | L. Lingual Gyrus            |
|      | 3.48 | -4,-98,-8   | L. Calcarine Sulcus         |
|      | 3.14 | 16,-98,-10  | R. Lingual Gyrus            |
|      | 2.88 | -4,-102,2   | L. Calcarine Sulcus         |
|      | 2.81 | -24,-86,-6  | L. Inferior Occipital Gyrus |
|      | 2.74 | 0,-98,10    | L. Calcarine Sulcus         |
| 309  | 4.36 | 8,-14,-30   | Brainstem                   |
|      | 3.78 | 0,-12,-30   | Brainstem                   |
|      | 3.62 | -18,-6,-24  | L. Parahippocampal Gyrus    |
|      | 3.58 | -2,-2,-20   | L. Parahippocampal Gyrus    |
| 264  | 3.98 | 6,10,-8     | R. Caudate                  |
|      | 3.79 | -6,4,-4     | L. Caudate                  |
|      | 3.66 | -4,12,-8    | L. Caudate                  |

|     |      |          |                                |
|-----|------|----------|--------------------------------|
|     | 3.36 | -20,10,4 | L. Putamen                     |
| 260 | 3.63 | 14,56,28 | R. Superior Frontal Gyrus      |
|     | 3.60 | 12,50,36 | R. Med. Superior Frontal Gyrus |
|     | 3.45 | 10,58,20 | R. Med. Superior Frontal Gyrus |
| 351 | 3.60 | 36,54,8  | R. Middle Frontal Gyrus        |
|     | 3.33 | 32,44,12 | R. Middle Frontal Gyrus        |
|     | 3.06 | 22,44,18 | R. Superior Frontal Gyrus      |
|     | 2.98 | 24,54,6  | R. Superior Frontal Gyrus      |

---

ADAS-Cog Del., ADAS-Cog Delayed Recall Score; ADAS-Cog Recog., ADAS-Cog Recognition Score; FCSRT Free Recall, Free-Cued and Selective Reminding Test Free Recall Score; FCSRT Total, Free-Cued and Selective Reminding Test Total Score; FR, Post-scan Free Recall; FCR, Post-scan Forced-Choice Recognition; CDR-sb, CDR Sum-of-Boxes; MMSE, Mini-Mental State Examination; Med., Medial; R., Right; L., Left

---

**Table S4. Significant R>N Correlations with Performance Using a Right Hippocampal Seed**

| <i>Clinical/Cognitive Measure</i> | <i>Cluster Size</i> | <i>Peak T-statistic</i> | <i>Peak X,Y,Z</i> | <i>Region</i>                            |
|-----------------------------------|---------------------|-------------------------|-------------------|------------------------------------------|
| <i>ADAS-Cog Recog.</i>            |                     |                         |                   |                                          |
|                                   | 699                 | 5.18                    | 24,-50,-54        | R. Cerebellum                            |
|                                   |                     | 3.67                    | 40,-56,-44        | R. Cerebellum                            |
|                                   |                     | 3.52                    | 12,-38,-26        | R. Cerebellum                            |
|                                   |                     | 3.52                    | 18,-48,-26        | R. Cerebellum                            |
|                                   |                     | 3.48                    | 18,-42,-42        | R. Cerebellum                            |
|                                   |                     | 3.44                    | 18,-58,-52        | R. Cerebellum                            |
|                                   |                     | 3.33                    | 10,-52,-20        | R. Cerebellum                            |
|                                   |                     | 2.87                    | 30,-52,-42        | R. Cerebellum                            |
|                                   |                     | 2.70                    | 24,-34,-24        | R. Cerebellum                            |
|                                   |                     | 2.65                    | 12,-64,-58        | R. Cerebellum                            |
|                                   | 836                 | 3.66                    | 34,26,-6          | R. Inferior Frontal Gyrus - orbital part |
|                                   |                     | 3.59                    | 42,18,-4          | R. Insula                                |
|                                   |                     | 3.26                    | 16,22,4           | R. Caudate                               |
|                                   |                     | 3.11                    | 22,24,12          | R. Caudate                               |
|                                   |                     | 2.97                    | 24,38,-6          | R. Inferior Frontal Gyrus - orbital part |
|                                   |                     | 2.87                    | 10,36,2           | R. Anterior Cingulate Cortex             |
|                                   |                     | 2.80                    | 56,14,-10         | R. Superior Temporal Pole                |
|                                   |                     | 2.63                    | 32,20,14          | R. Insula                                |
|                                   | 299                 | 3.61                    | -8,-42,30         | L. Posterior Cingulate Cortex            |
|                                   |                     | 3.36                    | -4,-60,24         | L. Precuneus                             |
|                                   |                     | 2.75                    | -6,-60,36         | L. Precuneus                             |
|                                   | 184                 | 3.46                    | 8,-82,18          | R. Cuneus                                |
|                                   |                     | 3.18                    | 4,-92,16          | R. Cuneus                                |
|                                   |                     | 3.05                    | 2,-82,6           | R. Calcarine Sulcus                      |
|                                   |                     | 2.60                    | 12,-90,28         | R. Cuneus                                |
|                                   | 177                 | 3.45                    | -14,18,6          | L. Caudate                               |
| <i>ADAS-Cog Total</i>             |                     |                         |                   |                                          |
|                                   | 276                 | 4.79                    | 40,-36,14         | R. Superior Temporal Gyrus               |
|                                   |                     | 3.96                    | 34,-42,20         | White Matter                             |
|                                   |                     | 3.19                    | 42,-46,14         | R. Middle Temporal Gyrus                 |
|                                   |                     | 2.68                    | 18,-46,18         | R. Precuneus                             |
|                                   | 302                 | 4.14                    | 36,4,50           | R. Precentral Gyrus                      |
|                                   |                     | 3.28                    | 48,-4,44          | R. Precentral Gyrus                      |
|                                   |                     | 2.94                    | 42,2,36           | R. Precentral Gyrus                      |
|                                   | 247                 | 3.88                    | 28,-34,38         | R. Postcentral Gyrus                     |
|                                   |                     | 3.34                    | 24,-44,38         | R. Postcentral Gyrus                     |
|                                   |                     | 3.33                    | 32,-40,46         | R. Supramargina Gyrus                    |
|                                   |                     | 3.04                    | 24,-30,52         | R. Postcentral Gyrus                     |
| <i>FCSRT Free Recall</i>          |                     |                         |                   |                                          |
|                                   | 308                 | 4.95                    | 18,62,-6          | R. Superior Frontal Gyrus - orbital part |
|                                   |                     | 3.49                    | 24,70,8           | R. Superior Frontal Gyrus                |
|                                   | 265                 | 3.50                    | 28,-26,58         | R. Precentral Gyrus                      |
|                                   |                     | 3.29                    | 32,-8,66          | R. Superior Frontal Gyrus                |
|                                   |                     | 2.82                    | 26,-16,72         | R. Precentral Gyrus                      |
| <i>FCSRT Total</i>                |                     |                         |                   |                                          |
|                                   | 175                 | 5.23                    | 28,30,40          | R. Middle Frontal Gyrus                  |



|     |      |          |                           |
|-----|------|----------|---------------------------|
| 603 | 3.98 | 46,-4,46 | R. Precentral Gyrus       |
|     | 3.48 | 30,-6,56 | R. Precentral Gyrus       |
|     | 3.25 | 62,-4,46 | R. Precentral Gyrus       |
|     | 3.24 | 30,-4,66 | R. Superior Frontal Gyrus |
|     | 3.22 | 36,4,50  | R. Precentral Gyrus       |
|     | 3.18 | 44,8,36  | R. Precentral Gyrus       |

*FR*

|      |      |             |                               |
|------|------|-------------|-------------------------------|
| 359  | 5.45 | 58,-58,18   | R. Middle Temporal Gyrus      |
|      | 3.36 | 66,-50,6    | R. Middle Temporal Gyrus      |
|      | 2.99 | 60,-66,20   | R. Middle Temporal Gyrus      |
| 180  | 4.90 | 12,-16,-12  | R. Hippocampus                |
| 3667 | 4.87 | -22,10,50   | L. Middle Frontal Gyrus       |
|      | 4.40 | -28,-2,56   | L. Middle Frontal Gyrus       |
|      | 4.28 | -42,10,50   | L. Middle Frontal Gyrus       |
|      | 4.20 | -40,8,42    | L. Precentral Gyrus           |
|      | 4.15 | -32,-22,36  | L. Postcentral Gyrus          |
|      | 4.07 | -30,8,28    | L. Inferior Frontal Operculum |
|      | 3.96 | -20,-8,40   | L. Middle Cingulate Cortex    |
|      | 3.93 | -38,-12,20  | L. Insula                     |
|      | 3.87 | -10,-46,38  | L. Precuneus                  |
|      | 3.74 | -28,-10,28  | White Matter                  |
|      | 3.62 | -16,-28,54  | L. Paracentral Lobule         |
|      | 3.57 | -36,0,64    | L. Precentral Gyrus           |
|      | 3.51 | -58,0,40    | L. Precentral Gyrus           |
|      | 3.46 | -20,-22,42  | L. Middle Cingulate Cortex    |
|      | 3.41 | -32,-8,48   | L. Precentral Gyrus           |
|      | 3.38 | -22,8,34    | L. Middle Frontal Gyrus       |
|      | 3.37 | -6,-24,30   | L. Middle Cingulate Cortex    |
|      | 3.37 | -22,-36,38  | L. Middle Cingulate Cortex    |
|      | 3.30 | -48,-2,56   | L. Precentral Gyrus           |
|      | 3.25 | 4,-14,40    | R. Middle Cingulate Cortex    |
|      | 3.17 | -4,-30,42   | L. Middle Cingulate Cortex    |
|      | 3.13 | -30,-2,12   | L. Insula                     |
|      | 3.09 | -58,10,40   | L. Precentral Gyrus           |
|      | 3.03 | -22,-10,56  | L. Superior Frontal Gyrus     |
|      | 2.98 | -26,-34,46  | L. Postcentral Gyrus          |
|      | 2.92 | 0,-40,44    | L. Middle Cingulate Cortex    |
|      | 2.81 | -52,-14,16  | L. Postcentral Gyrus          |
|      | 2.77 | -14,-6,52   | L. Supplementary Motor Area   |
|      | 2.76 | -8,-6,58    | L. Supplementary Motor Area   |
|      | 2.61 | -32,-6,2    | L. Putamen                    |
| 449  | 4.82 | -64,-50,-2  | L. Middle Temporal Gyrus      |
|      | 4.35 | -54,-54,-6  | L. Inferior Temporal Gyrus    |
|      | 3.46 | -64,-38,-6  | L. Middle Temporal Gyrus      |
|      | 3.36 | -46,-46,-20 | L. Inferior Temporal Gyrus    |
|      | 3.18 | -36,-42,-20 | L. Fusiform Gyrus             |
| 588  | 4.65 | -50,-60,38  | L. Angular Gyrus              |
|      | 4.57 | -54,-38,48  | L. Inferior Parietal Lobule   |
|      | 4.20 | -58,-48,46  | L. Inferior Parietal Lobule   |
|      | 4.04 | -54,-24,48  | L. Inferior Parietal Lobule   |
|      | 3.29 | -54,-40,56  | L. Inferior Parietal Lobule   |
|      | 2.79 | -44,-54,34  | L. Angular Gyrus              |
| 1417 | 4.42 | 34,8,56     | R. Middle Frontal Gyrus       |
|      | 4.08 | 20,6,40     | R. Middle Frontal Gyrus       |

|     |      |            |                                            |
|-----|------|------------|--------------------------------------------|
|     | 4.02 | 40,2,30    | R. Precentral Gyrus                        |
|     | 3.95 | 52,-6,52   | R. Middle Frontal Gyrus                    |
|     | 3.70 | 30,24,44   | R. Middle Frontal Gyrus                    |
|     | 3.61 | 24,8,52    | R. Superior Frontal Gyrus                  |
|     | 3.08 | 42,-6,60   | R. Precentral Gyrus                        |
|     | 3.07 | 34,-4,54   | R. Middle Frontal Gyrus                    |
|     | 3.06 | 16,-6,44   | R. Middle Cingulate Cortex                 |
|     | 2.86 | 22,18,44   | R. Superior Frontal Gyrus                  |
|     | 2.85 | 16,10,58   | R. Superior Frontal Gyrus                  |
| 679 | 4.31 | -38,20,6   | L. Inferior Frontal Gyrus - pars triangula |
|     | 3.80 | -50,24,2   | L. Inferior Frontal Gyrus - pars triangula |
|     | 3.47 | -52,40,2   | L. Inferior Frontal Gyrus - pars triangula |
|     | 3.39 | -58,32,10  | L. Inferior Frontal Gyrus - pars triangula |
|     | 3.29 | -58,10,16  | L. Inferior Frontal Operculum              |
|     | 3.19 | -52,16,18  | L. Inferior Frontal Operculum              |
|     | 2.56 | -60,8,6    | L. Inferior Frontal Operculum              |
| 251 | 4.23 | 58,-48,46  | R. Inferior Parietal Lobule                |
|     | 3.43 | 50,-64,48  | R. Angular Gyrus                           |
| 310 | 4.13 | 16,-4,72   | R. Superior Frontal Gyrus                  |
|     | 3.67 | 14,-4,64   | R. Supplementary Motor Area                |
|     | 3.37 | 16,-14,64  | R. Supplementary Motor Area                |
| 236 | 4.02 | 52,-52,-16 | R. Inferior Temporal Gyrus                 |
|     | 3.61 | 44,-42,-22 | R. Fusiform Gyrus                          |
| 257 | 3.45 | -52,-44,22 | L. Superior Temporal Gyrus                 |
|     | 3.35 | -44,-52,14 | L. Middle Temporal Gyrus                   |
|     | 2.93 | -56,-30,20 | L. Superior Temporal Gyrus                 |
| 293 | 3.45 | -20,-10,-2 | L. Pallidum                                |
|     | 3.05 | -24,-16,10 | L. Putamen                                 |
|     | 2.94 | -14,-20,8  | L. Thalamus                                |
|     | 2.92 | -12,-10,8  | L. Thalamus                                |

*CDR-sb*

|     |      |            |                               |
|-----|------|------------|-------------------------------|
| 180 | 4.79 | 34,-38,48  | R. Supramarginal Gyrus        |
| 230 | 4.33 | -36,-60,-6 | L. Inferior Occipital Gyrus   |
|     | 3.51 | -28,-74,8  | L. Middle Occipital Gyrus     |
|     | 2.93 | -26,-68,-2 | L. Lingual Gyrus              |
| 269 | 3.97 | 34,-42,20  | White Matter                  |
|     | 3.66 | 30,-58,24  | R. Precuneus                  |
|     | 2.91 | 42,-46,14  | R. Middle Temporal Gyrus      |
| 190 | 3.69 | 10,-36,8   | R. Posterior Cingulate Cortex |
|     | 2.88 | 4,-42,0    | R. Cerebellum                 |

*MMSE*

|     |      |          |                     |
|-----|------|----------|---------------------|
| 216 | 4.05 | 36,4,50  | R. Precentral Gyrus |
|     | 3.17 | 48,-4,46 | R. Precentral Gyrus |
|     | 2.73 | 42,4,34  | R. Precentral Gyrus |

---

ADAS-Cog Del., ADAS-Cog Delayed Recall Score; ADAS-Cog Recog., ADAS-Cog Recognition Score; FCSRT Free Recall, Free-Cued and Selective Reminding Test Free Recall Score; FCSRT Total, Free-Cued and Selective Reminding Test Total Score; FR, Post-scan Free Recall; FCR, Post-scan Forced-Choice Recognition; CDR-sb, CDR Sum-of-Boxes; MMSE, Mini-Mental State Examination; Med., Medial; R., Right; L., Left

---

**Table S5. Spatial Distribution for the top 25% of voxels**

| <i>Clinical/Cognitive Measure</i> | <i>ICA Network</i>   |                       |                             |                   |                     |                 |                          |                       |
|-----------------------------------|----------------------|-----------------------|-----------------------------|-------------------|---------------------|-----------------|--------------------------|-----------------------|
|                                   | <i>Medial Visual</i> | <i>Lateral Visual</i> | <i>Default-Mode Network</i> | <i>Cerebellum</i> | <i>Sensorimotor</i> | <i>Auditory</i> | <i>Executive Control</i> | <i>Frontoparietal</i> |
| <i>Network Size (Voxels)</i>      | 24658                | 17195                 | 17658                       | 14738             | 25165               | 23712           | 26970                    | 47532                 |
| <i>L. Hippocampus - N&gt;R</i>    |                      |                       |                             |                   |                     |                 |                          |                       |
| ADAS-Cog Recall                   | <b>0.258</b>         | <b>0.287</b>          | <b>0.372</b>                | 0.242             | 0.188               | <b>0.361</b>    | 0.108                    | 0.248                 |
| ADAS-Cog Del. Recall              | 0.124                | 0.127                 | <b>0.340</b>                | <b>0.355</b>      | <b>0.321</b>        | <b>0.453</b>    | 0.083                    | 0.250                 |
| ADAS-Cog Recog.                   | 0.230                | 0.232                 | <b>0.336</b>                | 0.105             | 0.373               | <b>0.295</b>    | 0.089                    | <b>0.283</b>          |
| ADAS-Cog Total                    | 0.224                | 0.239                 | <b>0.376</b>                | 0.227             | 0.209               | <b>0.395</b>    | 0.069                    | <b>0.280</b>          |
| FCSRT Free Recall                 | 0.249                | <b>0.314</b>          | <b>0.492</b>                | 0.174             | <b>0.260</b>        | <b>0.305</b>    | 0.057                    | 0.237                 |
| FCSRT Total                       | <b>0.352</b>         | <b>0.406</b>          | <b>0.359</b>                | 0.165             | 0.234               | <b>0.270</b>    | 0.077                    | 0.224                 |
| FR                                | <b>0.538</b>         | <b>0.461</b>          | 0.197                       | <b>0.313</b>      | 0.169               | <b>0.279</b>    | 0.119                    | 0.127                 |
| FCR                               | <b>0.323</b>         | <b>0.311</b>          | <b>0.376</b>                | <b>0.422</b>      | 0.126               | <b>0.284</b>    | 0.228                    | 0.151                 |
| CDR-sb                            | 0.214                | 0.140                 | <b>0.496</b>                | 0.239             | 0.159               | 0.194           | <b>0.273</b>             | <b>0.284</b>          |
| MMSE                              | 0.237                | <b>0.286</b>          | <b>0.435</b>                | 0.212             | 0.169               | <b>0.372</b>    | 0.077                    | <b>0.266</b>          |
| <i>L. Hippocampus - R&gt;N</i>    |                      |                       |                             |                   |                     |                 |                          |                       |
| ADAS-Cog Recall                   | 0.189                | 0.169                 | 0.215                       | <b>0.257</b>      | 0.244               | 0.143           | <b>0.436</b>             | <b>0.273</b>          |
| ADAS-Cog Del. Recall              | <b>0.380</b>         | <b>0.334</b>          | 0.215                       | 0.180             | 0.164               | 0.092           | <b>0.373</b>             | 0.242                 |
| ADAS-Cog Recog.                   | 0.235                | 0.203                 | <b>0.270</b>                | <b>0.398</b>      | 0.094               | 0.213           | <b>0.475</b>             | 0.194                 |
| ADAS-Cog Total                    | 0.209                | 0.228                 | 0.206                       | 0.285             | 0.215               | 0.148           | <b>0.455</b>             | 0.238                 |
| FCSRT Free Recall                 | 0.242                | 0.152                 | 0.168                       | <b>0.348</b>      | 0.204               | 0.140           | <b>0.449</b>             | <b>0.256</b>          |
| FCSRT Total                       | 0.188                | 0.120                 | 0.224                       | <b>0.362</b>      | 0.168               | 0.180           | <b>0.466</b>             | <b>0.260</b>          |
| FR                                | 0.092                | 0.163                 | 0.196                       | 0.165             | <b>0.315</b>        | 0.234           | 0.232                    | <b>0.394</b>          |
| FCR                               | 0.168                | 0.199                 | 0.156                       | 0.124             | <b>0.412</b>        | 0.210           | 0.169                    | <b>0.365</b>          |
| CDR-sb                            | <b>0.277</b>         | <b>0.372</b>          | 0.114                       | 0.249             | <b>0.317</b>        | <b>0.292</b>    | 0.167                    | 0.234                 |
| MMSE                              | 0.225                | 0.176                 | 0.176                       | <b>0.269</b>      | <b>0.260</b>        | 0.127           | <b>0.444</b>             | <b>0.258</b>          |
| <i>R. Hippocampus - N&gt;R</i>    |                      |                       |                             |                   |                     |                 |                          |                       |
| ADAS-Cog Recall                   | <b>0.277</b>         | 0.229                 | <b>0.286</b>                | <b>0.324</b>      | 0.108               | <b>0.392</b>    | 0.189                    | 0.246                 |
| ADAS-Cog Del. Recall              | <b>0.374</b>         | <b>0.374</b>          | <b>0.389</b>                | <b>0.473</b>      | 0.071               | 0.203           | 0.078                    | 0.236                 |
| ADAS-Cog Recog.                   | <b>0.399</b>         | <b>0.343</b>          | <b>0.286</b>                | 0.215             | 0.139               | <b>0.255</b>    | 0.131                    | <b>0.261</b>          |
| ADAS-Cog Total                    | <b>0.349</b>         | <b>0.305</b>          | 0.275                       | <b>0.346</b>      | 0.063               | <b>0.293</b>    | 0.168                    | <b>0.264</b>          |
| FCSRT Free Recall                 | <b>0.421</b>         | <b>0.342</b>          | <b>0.314</b>                | <b>0.252</b>      | 0.095               | <b>0.305</b>    | 0.129                    | 0.227                 |
| FCSRT Total                       | <b>0.493</b>         | <b>0.437</b>          | <b>0.271</b>                | <b>0.261</b>      | 0.086               | 0.244           | 0.101                    | 0.219                 |
| FR                                | <b>0.539</b>         | <b>0.408</b>          | 0.232                       | <b>0.505</b>      | 0.083               | 0.216           | 0.133                    | 0.142                 |
| FCR                               | <b>0.456</b>         | <b>0.270</b>          | 0.226                       | <b>0.373</b>      | 0.085               | 0.207           | <b>0.334</b>             | 0.168                 |
| CDR-sb                            | 0.233                | 0.166                 | <b>0.382</b>                | <b>0.262</b>      | 0.157               | 0.240           | <b>0.329</b>             | 0.245                 |
| MMSE                              | <b>0.350</b>         | <b>0.317</b>          | <b>0.305</b>                | <b>0.280</b>      | 0.061               | <b>0.307</b>    | 0.194                    | 0.247                 |
| <i>R. Hippocampus - R&gt;N</i>    |                      |                       |                             |                   |                     |                 |                          |                       |
| ADAS-Cog Recall                   | 0.181                | <b>0.268</b>          | <b>0.292</b>                | 0.187             | <b>0.388</b>        | 0.121           | 0.229                    | <b>0.287</b>          |
| ADAS-Cog Del. Recall              | 0.130                | 0.117                 | 0.147                       | 0.098             | <b>0.384</b>        | 0.239           | <b>0.493</b>             | 0.243                 |
| ADAS-Cog Recog.                   | 0.177                | 0.139                 | <b>0.263</b>                | <b>0.260</b>      | 0.249               | 0.206           | <b>0.378</b>             | <b>0.270</b>          |
| ADAS-Cog Total                    | 0.140                | 0.216                 | 0.224                       | 0.151             | <b>0.438</b>        | 0.185           | <b>0.321</b>             | <b>0.252</b>          |
| FCSRT Free Recall                 | 0.119                | 0.166                 | 0.200                       | 0.175             | <b>0.486</b>        | 0.136           | <b>0.315</b>             | <b>0.285</b>          |
| FCSRT Total                       | 0.110                | 0.105                 | 0.223                       | 0.169             | <b>0.440</b>        | 0.153           | <b>0.372</b>             | <b>0.289</b>          |
| FR                                | 0.106                | 0.126                 | 0.210                       | 0.092             | <b>0.428</b>        | <b>0.283</b>    | 0.179                    | <b>0.362</b>          |
| FCR                               | 0.119                | 0.235                 | 0.244                       | 0.178             | <b>0.491</b>        | 0.242           | 0.126                    | <b>0.295</b>          |
| CDR-sb                            | 0.219                | <b>0.382</b>          | 0.230                       | 0.232             | <b>0.336</b>        | 0.203           | 0.190                    | 0.244                 |
| MMSE                              | 0.153                | 0.206                 | 0.207                       | 0.160             | <b>0.515</b>        | 0.152           | 0.244                    | <b>0.272</b>          |

Values are percentage of network that contains selected voxels. **Red bolded** values indicate values that are at or exceed the expected value from a uniform distribution across the brain. The expected value is 0.25, or 25% of each network. ADAS-Cog Del., ADAS-Cog Delayed Recall Score; ADAS-Cog Recog., ADAS-Cog Recognition Score; FCSRT Free Recall, Free-Cued and Selective Reminding Test Free Recall Score; FCSRT Total, Free-Cued and Selective Reminding Test Total Score; FR, Post-scan Free Recall; FCR, Post-scan Forced-Choice Recognition; CDR-sb, CDR Sum-of-Boxes; MMSE, Mini-Mental State Examination; L, Left; R, Right

**Table S6. Spatial Distribution for the top 5% of voxels**

| <i>Clinical/Cognitive Measure</i> | <i>ICA Network</i>   |                       |                             |                   |                     |                 |                          |                       |
|-----------------------------------|----------------------|-----------------------|-----------------------------|-------------------|---------------------|-----------------|--------------------------|-----------------------|
|                                   | <i>Medial Visual</i> | <i>Lateral Visual</i> | <i>Default-Mode Network</i> | <i>Cerebellum</i> | <i>Sensorimotor</i> | <i>Auditory</i> | <i>Executive Control</i> | <i>Frontoparietal</i> |
| <i>Network Size (Voxels)</i>      | 24658                | 17195                 | 17658                       | 14738             | 25165               | 23712           | 26970                    | 47532                 |
| <i>L. Hippocampus - N&gt;R</i>    |                      |                       |                             |                   |                     |                 |                          |                       |
| ADAS-Cog Recall                   | 0.041                | <b>0.056</b>          | <b>0.085</b>                | 0.049             | 0.022               | <b>0.074</b>    | 0.018                    | <b>0.060</b>          |
| ADAS-Cog Del. Recall              | 0.019                | 0.030                 | <b>0.081</b>                | <b>0.093</b>      | <b>0.050</b>        | <b>0.103</b>    | 0.018                    | 0.040                 |
| ADAS-Cog Recog.                   | 0.031                | <b>0.048</b>          | <b>0.087</b>                | 0.007             | <b>0.064</b>        | <b>0.074</b>    | 0.010                    | <b>0.064</b>          |
| ADAS-Cog Total                    | 0.024                | 0.049                 | <b>0.099</b>                | 0.033             | 0.022               | <b>0.108</b>    | 0.012                    | <b>0.059</b>          |
| FCSRT Free Recall                 | <b>0.058</b>         | <b>0.052</b>          | <b>0.152</b>                | 0.032             | 0.037               | 0.047           | 0.005                    | <b>0.047</b>          |
| FCSRT Total                       | <b>0.090</b>         | <b>0.079</b>          | <b>0.089</b>                | 0.027             | 0.044               | 0.038           | 0.009                    | 0.044                 |
| FR                                | <b>0.148</b>         | <b>0.136</b>          | 0.009                       | 0.047             | 0.021               | <b>0.056</b>    | 0.010                    | 0.019                 |
| FCR                               | <b>0.065</b>         | 0.049                 | <b>0.077</b>                | <b>0.125</b>      | 0.023               | <b>0.055</b>    | 0.030                    | 0.032                 |
| CDR-sb                            | 0.041                | 0.025                 | <b>0.170</b>                | 0.029             | 0.011               | 0.026           | 0.032                    | <b>0.068</b>          |
| MMSE                              | 0.044                | <b>0.052</b>          | <b>0.125</b>                | 0.035             | 0.021               | <b>0.070</b>    | 0.012                    | <b>0.056</b>          |
| <i>L. Hippocampus - R&gt;N</i>    |                      |                       |                             |                   |                     |                 |                          |                       |
| ADAS-Cog Recall                   | 0.032                | 0.034                 | <b>0.061</b>                | <b>0.059</b>      | 0.038               | 0.020           | <b>0.089</b>             | <b>0.058</b>          |
| ADAS-Cog Del. Recall              | <b>0.112</b>         | <b>0.060</b>          | 0.044                       | 0.043             | 0.033               | 0.010           | <b>0.076</b>             | 0.033                 |
| ADAS-Cog Recog.                   | 0.033                | 0.026                 | <b>0.075</b>                | <b>0.142</b>      | 0.016               | 0.033           | <b>0.096</b>             | 0.030                 |
| ADAS-Cog Total                    | 0.038                | 0.043                 | 0.040                       | <b>0.074</b>      | 0.034               | 0.022           | <b>0.107</b>             | 0.046                 |
| FCSRT Free Recall                 | 0.037                | 0.021                 | <b>0.055</b>                | <b>0.062</b>      | 0.032               | 0.014           | <b>0.125</b>             | 0.047                 |
| FCSRT Total                       | 0.027                | 0.021                 | <b>0.080</b>                | <b>0.110</b>      | 0.016               | 0.034           | <b>0.092</b>             | 0.045                 |
| FR                                | 0.021                | 0.045                 | 0.015                       | 0.027             | 0.041               | <b>0.052</b>    | 0.030                    | <b>0.102</b>          |
| FCR                               | 0.024                | 0.031                 | 0.021                       | 0.017             | <b>0.109</b>        | 0.038           | 0.026                    | <b>0.080</b>          |
| CDR-sb                            | 0.049                | <b>0.081</b>          | 0.017                       | 0.045             | <b>0.069</b>        | <b>0.067</b>    | 0.024                    | 0.050                 |
| MMSE                              | 0.044                | 0.035                 | 0.041                       | <b>0.059</b>      | 0.041               | 0.016           | <b>0.097</b>             | <b>0.055</b>          |
| <i>R. Hippocampus - N&gt;R</i>    |                      |                       |                             |                   |                     |                 |                          |                       |
| ADAS-Cog Recall                   | 0.044                | 0.029                 | <b>0.085</b>                | <b>0.063</b>      | 0.012               | <b>0.079</b>    | 0.034                    | <b>0.058</b>          |
| ADAS-Cog Del. Recall              | <b>0.080</b>         | <b>0.070</b>          | <b>0.099</b>                | <b>0.113</b>      | 0.005               | 0.025           | 0.015                    | 0.045                 |
| ADAS-Cog Recog.                   | <b>0.120</b>         | 0.046                 | <b>0.068</b>                | 0.016             | 0.012               | <b>0.052</b>    | 0.020                    | <b>0.055</b>          |
| ADAS-Cog Total                    | <b>0.076</b>         | 0.031                 | <b>0.068</b>                | <b>0.070</b>      | 0.007               | 0.048           | 0.035                    | <b>0.062</b>          |
| FCSRT Free Recall                 | <b>0.115</b>         | <b>0.067</b>          | <b>0.060</b>                | 0.031             | 0.020               | 0.041           | 0.018                    | <b>0.051</b>          |
| FCSRT Total                       | <b>0.173</b>         | <b>0.100</b>          | 0.037                       | 0.020             | 0.009               | 0.034           | 0.008                    | 0.035                 |
| FR                                | <b>0.171</b>         | <b>0.077</b>          | 0.028                       | <b>0.131</b>      | 0.012               | 0.013           | 0.012                    | 0.021                 |
| FCR                               | <b>0.116</b>         | <b>0.052</b>          | 0.033                       | <b>0.109</b>      | 0.016               | 0.015           | <b>0.069</b>             | 0.028                 |
| CDR-sb                            | <b>0.053</b>         | 0.025                 | <b>0.106</b>                | <b>0.062</b>      | 0.017               | 0.030           | <b>0.084</b>             | 0.041                 |
| MMSE                              | <b>0.093</b>         | 0.048                 | <b>0.074</b>                | <b>0.057</b>      | 0.009               | 0.043           | 0.039                    | 0.049                 |
| <i>R. Hippocampus - R&gt;N</i>    |                      |                       |                             |                   |                     |                 |                          |                       |
| ADAS-Cog Recall                   | 0.020                | <b>0.059</b>          | <b>0.061</b>                | 0.028             | <b>0.093</b>        | 0.015           | 0.035                    | <b>0.068</b>          |
| ADAS-Cog Del. Recall              | 0.018                | 0.016                 | 0.010                       | 0.012             | <b>0.083</b>        | <b>0.060</b>    | <b>0.127</b>             | 0.039                 |
| ADAS-Cog Recog.                   | 0.031                | 0.013                 | <b>0.051</b>                | 0.055             | 0.045               | 0.033           | <b>0.103</b>             | <b>0.053</b>          |
| ADAS-Cog Total                    | 0.024                | 0.037                 | 0.042                       | 0.022             | <b>0.097</b>        | 0.027           | <b>0.080</b>             | 0.049                 |
| FCSRT Free Recall                 | 0.020                | 0.026                 | 0.029                       | 0.026             | <b>0.120</b>        | 0.021           | <b>0.056</b>             | <b>0.064</b>          |
| FCSRT Total                       | 0.013                | 0.010                 | <b>0.051</b>                | 0.027             | <b>0.106</b>        | 0.020           | <b>0.055</b>             | <b>0.074</b>          |
| FR                                | 0.019                | 0.024                 | 0.035                       | 0.008             | <b>0.100</b>        | 0.042           | 0.017                    | <b>0.090</b>          |
| FCR                               | 0.016                | <b>0.051</b>          | <b>0.053</b>                | 0.039             | <b>0.114</b>        | 0.035           | 0.027                    | <b>0.056</b>          |
| CDR-sb                            | 0.033                | <b>0.120</b>          | <b>0.061</b>                | 0.048             | <b>0.054</b>        | 0.046           | 0.025                    | 0.044                 |
| MMSE                              | 0.023                | 0.039                 | 0.035                       | 0.021             | <b>0.112</b>        | 0.031           | 0.044                    | <b>0.063</b>          |

Values are percentage of network that contains selected voxels. **Red bolded** values indicate values that are at or exceed the expected value from a uniform distribution across the brain. The expected value is 0.05, or 5% of each network. ADAS-Cog Del., ADAS-Cog Delayed Recall Score; ADAS-Cog Recog., ADAS-Cog Recognition Score; FCSRT Free Recall, Free-Cued and Selective Reminding Test Free Recall Score; FCSRT Total, Free-Cued and Selective Reminding Test Total Score; FR, Post-scan Free Recall; FCR, Post-scan Forced-Choice Recognition; CDR-sb, CDR Sum-of-Boxes; MMSE, Mini-Mental State Examination; L, Left; R, Right

**Table S7. Spatial Distribution for the top 1% of voxels**

| <i>Clinical/Cognitive Measure</i> | <i>ICA Network</i>   |                       |                             |                   |                     |                 |                          |                       |
|-----------------------------------|----------------------|-----------------------|-----------------------------|-------------------|---------------------|-----------------|--------------------------|-----------------------|
|                                   | <i>Medial Visual</i> | <i>Lateral Visual</i> | <i>Default-Mode Network</i> | <i>Cerebellum</i> | <i>Sensorimotor</i> | <i>Auditory</i> | <i>Executive Control</i> | <i>Frontoparietal</i> |
| <i>Network Size (Voxels)</i>      | 24658                | 17195                 | 17658                       | 14738             | 25165               | 23712           | 26970                    | 47532                 |
| <i>L. Hippocampus - N&gt;R</i>    |                      |                       |                             |                   |                     |                 |                          |                       |
| ADAS-Cog Recall                   | 0.006                | <b>0.017</b>          | <b>0.014</b>                | 0.009             | 0.005               | 0.009           | 0.005                    | <b>0.014</b>          |
| ADAS-Cog Del. Recall              | 0.004                | 0.009                 | <b>0.023</b>                | <b>0.019</b>      | <b>0.011</b>        | <b>0.020</b>    | 0.002                    | 0.005                 |
| ADAS-Cog Recog.                   | 0.002                | <b>0.013</b>          | <b>0.023</b>                | 0.000             | 0.008               | <b>0.021</b>    | 0.001                    | <b>0.013</b>          |
| ADAS-Cog Total                    | 0.003                | <b>0.014</b>          | <b>0.017</b>                | 0.007             | 0.005               | <b>0.024</b>    | 0.003                    | <b>0.010</b>          |
| FCSRT Free Recall                 | <b>0.011</b>         | 0.009                 | <b>0.034</b>                | 0.006             | 0.009               | <b>0.011</b>    | 0.001                    | 0.008                 |
| FCSRT Total                       | <b>0.024</b>         | <b>0.015</b>          | <b>0.020</b>                | 0.004             | 0.008               | 0.004           | 0.002                    | 0.008                 |
| FR                                | <b>0.028</b>         | <b>0.031</b>          | 0.001                       | 0.004             | 0.004               | <b>0.013</b>    | 0.002                    | 0.004                 |
| FCR                               | <b>0.011</b>         | 0.008                 | <b>0.015</b>                | <b>0.026</b>      | 0.006               | <b>0.012</b>    | 0.004                    | 0.007                 |
| CDR-sb                            | 0.007                | 0.003                 | <b>0.044</b>                | 0.005             | 0.000               | 0.004           | 0.003                    | <b>0.015</b>          |
| MMSE                              | 0.007                | <b>0.011</b>          | <b>0.028</b>                | 0.005             | 0.006               | <b>0.011</b>    | 0.002                    | <b>0.012</b>          |
| <i>L. Hippocampus - R&gt;N</i>    |                      |                       |                             |                   |                     |                 |                          |                       |
| ADAS-Cog Recall                   | 0.008                | 0.007                 | <b>0.013</b>                | <b>0.017</b>      | 0.007               | 0.003           | <b>0.016</b>             | <b>0.011</b>          |
| ADAS-Cog Del. Recall              | <b>0.029</b>         | 0.008                 | <b>0.011</b>                | <b>0.010</b>      | 0.008               | 0.001           | <b>0.011</b>             | 0.006                 |
| ADAS-Cog Recog.                   | 0.006                | 0.004                 | <b>0.019</b>                | <b>0.041</b>      | 0.002               | 0.005           | <b>0.020</b>             | 0.003                 |
| ADAS-Cog Total                    | <b>0.010</b>         | 0.006                 | 0.008                       | <b>0.020</b>      | 0.006               | 0.001           | <b>0.023</b>             | 0.008                 |
| FCSRT Free Recall                 | 0.005                | 0.002                 | <b>0.020</b>                | <b>0.012</b>      | 0.003               | 0.001           | <b>0.034</b>             | 0.007                 |
| FCSRT Total                       | 0.005                | 0.005                 | <b>0.025</b>                | <b>0.035</b>      | 0.003               | 0.004           | <b>0.016</b>             | 0.005                 |
| FR                                | 0.005                | <b>0.018</b>          | 0.002                       | 0.005             | 0.004               | <b>0.011</b>    | 0.005                    | <b>0.020</b>          |
| FCR                               | 0.003                | 0.005                 | 0.004                       | 0.003             | <b>0.027</b>        | 0.009           | 0.003                    | <b>0.015</b>          |
| CDR-sb                            | 0.008                | <b>0.019</b>          | 0.002                       | 0.008             | <b>0.012</b>        | <b>0.019</b>    | 0.002                    | <b>0.010</b>          |
| MMSE                              | <b>0.010</b>         | 0.006                 | 0.009                       | <b>0.013</b>      | 0.008               | 0.001           | <b>0.021</b>             | <b>0.011</b>          |
| <i>R. Hippocampus - N&gt;R</i>    |                      |                       |                             |                   |                     |                 |                          |                       |
| ADAS-Cog Recall                   | 0.005                | 0.005                 | <b>0.019</b>                | 0.009             | 0.004               | <b>0.017</b>    | 0.004                    | <b>0.014</b>          |
| ADAS-Cog Del. Recall              | <b>0.012</b>         | <b>0.014</b>          | <b>0.023</b>                | <b>0.028</b>      | 0.001               | 0.004           | 0.002                    | <b>0.010</b>          |
| ADAS-Cog Recog.                   | <b>0.035</b>         | 0.005                 | <b>0.013</b>                | 0.002             | 0.001               | 0.005           | 0.002                    | <b>0.012</b>          |
| ADAS-Cog Total                    | <b>0.011</b>         | 0.004                 | <b>0.016</b>                | <b>0.014</b>      | 0.002               | 0.009           | 0.006                    | <b>0.015</b>          |
| FCSRT Free Recall                 | <b>0.030</b>         | <b>0.010</b>          | <b>0.011</b>                | 0.004             | 0.007               | 0.006           | 0.002                    | 0.009                 |
| FCSRT Total                       | <b>0.056</b>         | <b>0.011</b>          | 0.003                       | 0.000             | 0.002               | 0.001           | 0.001                    | 0.006                 |
| FR                                | <b>0.048</b>         | <b>0.011</b>          | 0.002                       | <b>0.022</b>      | 0.001               | 0.001           | 0.001                    | 0.004                 |
| FCR                               | <b>0.025</b>         | 0.008                 | 0.003                       | <b>0.029</b>      | 0.003               | 0.001           | <b>0.012</b>             | 0.007                 |
| CDR-sb                            | <b>0.014</b>         | 0.004                 | <b>0.021</b>                | <b>0.016</b>      | 0.002               | 0.004           | <b>0.016</b>             | 0.008                 |
| MMSE                              | <b>0.020</b>         | 0.007                 | <b>0.018</b>                | 0.009             | 0.003               | 0.005           | 0.009                    | <b>0.010</b>          |
| <i>R. Hippocampus - R&gt;N</i>    |                      |                       |                             |                   |                     |                 |                          |                       |
| ADAS-Cog Recall                   | 0.002                | 0.009                 | <b>0.011</b>                | 0.004             | <b>0.021</b>        | 0.003           | 0.004                    | <b>0.017</b>          |
| ADAS-Cog Del. Recall              | 0.003                | 0.003                 | 0.001                       | 0.001             | <b>0.017</b>        | <b>0.015</b>    | <b>0.027</b>             | 0.006                 |
| ADAS-Cog Recog.                   | 0.009                | 0.002                 | <b>0.014</b>                | <b>0.014</b>      | 0.006               | 0.006           | <b>0.022</b>             | 0.008                 |
| ADAS-Cog Total                    | 0.006                | 0.005                 | 0.007                       | 0.002             | <b>0.021</b>        | 0.005           | <b>0.015</b>             | <b>0.011</b>          |
| FCSRT Free Recall                 | 0.001                | 0.006                 | 0.005                       | 0.006             | <b>0.024</b>        | 0.002           | <b>0.013</b>             | <b>0.013</b>          |
| FCSRT Total                       | 0.001                | 0.002                 | <b>0.010</b>                | 0.008             | <b>0.019</b>        | 0.003           | 0.004                    | <b>0.020</b>          |
| FR                                | 0.003                | 0.004                 | 0.007                       | 0.000             | <b>0.017</b>        | 0.006           | 0.002                    | <b>0.022</b>          |
| FCR                               | 0.002                | 0.009                 | 0.009                       | 0.008             | <b>0.031</b>        | 0.003           | 0.002                    | <b>0.012</b>          |
| CDR-sb                            | 0.006                | <b>0.032</b>          | <b>0.011</b>                | <b>0.010</b>      | 0.009               | <b>0.010</b>    | 0.006                    | 0.006                 |
| MMSE                              | 0.005                | 0.006                 | 0.006                       | 0.004             | <b>0.023</b>        | 0.006           | 0.004                    | <b>0.016</b>          |

Values are percentage of network that contains selected voxels. **Red bolded** values indicate values that are at or exceed the expected value from a uniform distribution across the brain. The expected value is 0.01, or 1% of each network. ADAS-Cog Del., ADAS-Cog Delayed Recall Score; ADAS-Cog Recog., ADAS-Cog Recognition Score; FCSRT Free Recall, Free-Cued and Selective Reminding Test Free Recall Score; FCSRT Total, Free-Cued and Selective Reminding Test Total Score; FR, Post-scan Free Recall; FCR, Post-scan Forced-Choice Recognition; CDR-sb, CDR Sum-of-Boxes; MMSE, Mini-Mental State Examination; L, Left; R, Right

**Table S8. Chi-Square Statistics for the top 25% of Voxel Radar Graph Shape Analysis**

|                                | ADAS-Cog Recall | ADAS-Cog Del. Recall | ADAS-Cog Recog. | ADAS-Cog Total | FCSRT Free Recall | FCSRT Total | FR      | FCR     | CDR-sb  | MMSE    | Expected |
|--------------------------------|-----------------|----------------------|-----------------|----------------|-------------------|-------------|---------|---------|---------|---------|----------|
| <i>L. Hippocampus - N&gt;R</i> |                 |                      |                 |                |                   |             |         |         |         |         |          |
| ADAS-Cog Recall                |                 | 3781.8               | 2809.3          | 529.4          | 1305.6            | 1558.5      | 6331.6  | 3708.0  | 4590.7  | 336.3   | 4880.6   |
| ADAS-Cog Del. Recall           |                 |                      | 4304.6          | 2555.5         | 4785.2            | 7760.0      | 14594.8 | 9682.1  | 8149.0  | 4074.9  | 11272.6  |
| ADAS-Cog Recog.                |                 |                      |                 | 2279.6         | 1884.1            | 2838.2      | 11387.2 | 10049.2 | 6885.8  | 3034.2  | 6530.1   |
| ADAS-Cog Total                 |                 |                      |                 |                | 1203.0            | 2510.3      | 9274.4  | 6534.4  | 5815.1  | 315.5   | 7092.2   |
| FCSRT Free Recall              |                 |                      |                 |                |                   | 1182.6      | 8579.2  | 6867.7  | 6553.0  | 939.3   | 9075.6   |
| FCSRT Total                    |                 |                      |                 |                |                   |             | 4313.9  | 5428.0  | 7598.4  | 1941.7  | 7400.2   |
| FR                             |                 |                      |                 |                |                   |             |         | 4230.8  | 13645.3 | 8346.5  | 17134.7  |
| FCR                            |                 |                      |                 |                |                   |             |         |         | 5218.2  | 5386.8  | 7224.5   |
| CDR-sb                         |                 |                      |                 |                |                   |             |         |         |         | 5292.4  | 6639.1   |
| MMSE                           |                 |                      |                 |                |                   |             |         |         |         |         | 7941.5   |
| <i>L. Hippocampus - R&gt;N</i> |                 |                      |                 |                |                   |             |         |         |         |         |          |
| ADAS-Cog Recall                |                 | 3600.2               | 3418.8          | 367.4          | 604.9             | 903.2       | 4608.4  | 6126.5  | 7110.7  | 214.7   | 5833.8   |
| ADAS-Cog Del. Recall           |                 |                      | 4919.6          | 2621.2         | 3370.8            | 5231.6      | 10652.1 | 9990.5  | 7001.7  | 3016.9  | 7293.8   |
| ADAS-Cog Recog.                |                 |                      |                 | 2202.8         | 2410.9            | 1650.2      | 11757.9 | 14398.9 | 10095.8 | 3711.1  | 10154.6  |
| ADAS-Cog Total                 |                 |                      |                 |                | 527.5             | 1025.9      | 6493.7  | 7821.7  | 6558.8  | 364.0   | 6077.2   |
| FCSRT Free Recall              |                 |                      |                 |                |                   | 595.1       | 7089.0  | 8464.2  | 7512.0  | 388.5   | 7364.8   |
| FCSRT Total                    |                 |                      |                 |                |                   |             | 6748.7  | 9520.0  | 9239.1  | 1307.2  | 8488.9   |
| FR                             |                 |                      |                 |                |                   |             |         | 1451.7  | 6723.2  | 5809.2  | 8025.2   |
| FCR                            |                 |                      |                 |                |                   |             |         |         | 4308.8  | 6603.2  | 8437.2   |
| CDR-sb                         |                 |                      |                 |                |                   |             |         |         |         | 6724.3  | 3829.0   |
| MMSE                           |                 |                      |                 |                |                   |             |         |         |         |         | 6367.5   |
| <i>R. Hippocampus - N&gt;R</i> |                 |                      |                 |                |                   |             |         |         |         |         |          |
| ADAS-Cog Recall                |                 | 4517.8               | 2347.2          | 1107.1         | 1882.9            | 4377.8      | 6509.6  | 4514.4  | 2731.5  | 1073.2  | 4877.5   |
| ADAS-Cog Del. Recall           |                 |                      | 2855.4          | 2137.1         | 2156.9            | 2001.7      | 3019.6  | 6309.2  | 8167.8  | 2881.2  | 13537.9  |
| ADAS-Cog Recog.                |                 |                      |                 | 1474.5         | 497.8             | 1094.1      | 4524.4  | 4790.9  | 4834.4  | 1446.0  | 5755.2   |
| ADAS-Cog Total                 |                 |                      |                 |                | 898.0             | 2015.8      | 3971.7  | 3430.8  | 4355.7  | 217.3   | 6235.9   |
| FCSRT Free Recall              |                 |                      |                 |                |                   | 666.3       | 3235.9  | 4091.3  | 5454.1  | 771.5   | 8108.4   |
| FCSRT Total                    |                 |                      |                 |                |                   |             | 2209.0  | 4824.8  | 8576.0  | 2107.9  | 13528.1  |
| FR                             |                 |                      |                 |                |                   |             |         | 3395.6  | 10703.8 | 4442.0  | 20452.3  |
| FCR                            |                 |                      |                 |                |                   |             |         |         | 4495.7  | 3096.8  | 10096.5  |
| CDR-sb                         |                 |                      |                 |                |                   |             |         |         |         | 3756.0  | 3318.0   |
| MMSE                           |                 |                      |                 |                |                   |             |         |         |         |         | 5799.3   |
| <i>R. Hippocampus - R&gt;N</i> |                 |                      |                 |                |                   |             |         |         |         |         |          |
| ADAS-Cog Recall                |                 | 6170.1               | 3219.1          | 1355.1         | 1701.9            | 2901.9      | 4248.1  | 2519.4  | 1499.2  | 1051.1  | 4668.2   |
| ADAS-Cog Del. Recall           |                 |                      | 3125.8          | 2204.2         | 2814.4            | 1800.4      | 5490.0  | 7893.8  | 7879.8  | 4144.8  | 12922.3  |
| ADAS-Cog Recog.                |                 |                      |                 | 2369.7         | 3163.3            | 2366.7      | 5787.3  | 6469.4  | 4202.9  | 4038.7  | 3429.5   |
| ADAS-Cog Total                 |                 |                      |                 |                | 541.5             | 1046.9      | 3259.8  | 2820.3  | 2752.6  | 582.7   | 6413.6   |
| FCSRT Free Recall              |                 |                      |                 |                |                   | 470.3       | 3239.8  | 3174.3  | 4348.1  | 490.2   | 10225.0  |
| FCSRT Total                    |                 |                      |                 |                |                   |             | 3511.6  | 4703.0  | 6030.9  | 1627.0  | 10239.5  |
| FR                             |                 |                      |                 |                |                   |             |         | 1785.5  | 5790.0  | 2834.3  | 10928.0  |
| FCR                            |                 |                      |                 |                |                   |             |         |         | 2838.9  | 1778.4  | 9901.5   |
| CDR-sb                         |                 |                      |                 |                |                   |             |         |         |         | 2795.5  | 2694.2   |
| MMSE                           |                 |                      |                 |                |                   |             |         |         |         |         | 9753.4   |
| <i>L/R Hippocampus</i>         |                 |                      |                 |                |                   |             |         |         |         |         |          |
| N>R                            | 1685.0          | 11796.9              | 5137.2          | 4910.4         | 4690.8            | 2977.6      | 1760.3  | 2382.7  | 725.3   | 3908.1  |          |
| R>N                            | 3386.2          | 9641.4               | 3495.6          | 3616.3         | 5578.7            | 5028.2      | 1214.1  | 1492.4  | 1318.2  | 4577.3  |          |
| <i>N&gt;R/R&gt;N</i>           |                 |                      |                 |                |                   |             |         |         |         |         |          |
| L. Hippocampal Seed            | 9352.3          | 18110.1              | 15096.1         | 11481.3        | 14466.8           | 13875.5     | 19593.8 | 14183.6 | 8954.4  | 12808.3 |          |
| R. Hippocampal Seed            | 8752.7          | 24411.1              | 7858.8          | 12657.9        | 16414.1           | 20974.1     | 24791.2 | 17384.1 | 4887.6  | 13566.2 |          |

All Chi-square statistics are significant ( $p < 0.001$ ) after bonferroni correction (780 tests). The minimum statistic that would be significant at  $p < 0.001$  is 39.9584 for 7 degrees of freedom. Values are percentage of network that contains selected voxels. Red bolded values indicate values that are at or exceed the expected value from a uniform distribution across the brain. The expected value is 0.25, or 25% of each network. ADAS-Cog Del., ADAS-Cog Delayed Recall Score; ADAS-Cog Recog., ADAS-Cog Recognition Score; FCSRT Free Recall, Free-Cued and Selective Reminding Test Free Recall Score; FCSRT Total, Free-Cued and Selective Reminding Test Total Score; FR, Post-scan Free Recall; FCR, Post-scan Forced-Choice Recognition; CDR-sb, CDR Sum-of-Boxes; MMSE, Mini-Mental State Examination; L, Left; R, Right

**Table S9. Chi-Square Statistics for the top 5% of Voxel Radar Graph Shape Analysis**

|                                | ADAS-Cog Recall | ADAS-Cog Del. Recall | ADAS-Cog Recog. | ADAS-Cog Total | FCSRT Free Recall | FCSRT Total | FR     | FCR    | CDR-sb | MMSE   | Expected |
|--------------------------------|-----------------|----------------------|-----------------|----------------|-------------------|-------------|--------|--------|--------|--------|----------|
| <i>L. Hippocampus - N&gt;R</i> |                 |                      |                 |                |                   |             |        |        |        |        |          |
| ADAS-Cog Recall                |                 | 1116.6               | 1079.9          | 365.7          | 969.0             | 1252.1      | 4291.9 | 1197.0 | 1550.8 | 215.7  | 1802.9   |
| ADAS-Cog Del. Recall           |                 |                      | 1702.6          | 1035.1         | 2170.0            | 2856.4      | 5881.9 | 1495.3 | 3431.9 | 1499.9 | 3491.0   |
| ADAS-Cog Recog.                |                 |                      |                 | 957.2          | 1255.2            | 1550.8      | 5916.2 | 3201.3 | 2643.0 | 1019.3 | 2635.8   |
| ADAS-Cog Total                 |                 |                      |                 |                | 1351.4            | 2159.0      | 5628.6 | 2296.7 | 2119.0 | 399.9  | 4104.9   |
| FCSRT Free Recall              |                 |                      |                 |                |                   | 624.0       | 4600.4 | 1956.3 | 1460.1 | 417.6  | 5003.2   |
| FCSRT Total                    |                 |                      |                 |                |                   |             | 2611.8 | 1805.0 | 2501.3 | 1088.8 | 2768.2   |
| FR                             |                 |                      |                 |                |                   |             |        | 3413.6 | 7419.5 | 4738.2 | 10091.8  |
| FCR                            |                 |                      |                 |                |                   |             |        |        | 2739.4 | 1605.6 | 2938.8   |
| CDR-sb                         |                 |                      |                 |                |                   |             |        |        |        | 1142.5 | 7031.4   |
| MMSE                           |                 |                      |                 |                |                   |             |        |        |        |        | 3475.3   |
| <i>L. Hippocampus - R&gt;N</i> |                 |                      |                 |                |                   |             |        |        |        |        |          |
| ADAS-Cog Recall                |                 | 1771.7               | 1277.7          | 247.8          | 322.8             | 739.5       | 2469.1 | 2800.5 | 2768.5 | 143.3  | 1693.1   |
| ADAS-Cog Del. Recall           |                 |                      | 2710.4          | 1437.8         | 1775.5            | 2817.9      | 4829.1 | 4879.0 | 3126.8 | 1286.3 | 3513.5   |
| ADAS-Cog Recog.                |                 |                      |                 | 963.9          | 1121.3            | 232.4       | 5238.0 | 5963.3 | 4495.2 | 1509.1 | 5322.8   |
| ADAS-Cog Total                 |                 |                      |                 |                | 258.1             | 775.2       | 3166.9 | 3619.9 | 2816.6 | 141.7  | 2584.1   |
| FCSRT Free Recall              |                 |                      |                 |                |                   | 792.2       | 3969.4 | 4223.8 | 4067.9 | 267.4  | 4218.3   |
| FCSRT Total                    |                 |                      |                 |                |                   |             | 4023.6 | 4904.6 | 4117.0 | 1104.7 | 3636.4   |
| FR                             |                 |                      |                 |                |                   |             |        | 1065.5 | 1614.2 | 2691.0 | 3855.4   |
| FCR                            |                 |                      |                 |                |                   |             |        |        | 1534.8 | 2922.3 | 4057.4   |
| CDR-sb                         |                 |                      |                 |                |                   |             |        |        |        | 2676.8 | 1434.9   |
| MMSE                           |                 |                      |                 |                |                   |             |        |        |        |        | 1953.0   |
| <i>R. Hippocampus - N&gt;R</i> |                 |                      |                 |                |                   |             |        |        |        |        |          |
| ADAS-Cog Recall                |                 | 1816.7               | 1613.4          | 466.9          | 1771.7            | 4333.1      | 5303.4 | 3338.2 | 1318.6 | 849.4  | 1972.9   |
| ADAS-Cog Del. Recall           |                 |                      | 1829.5          | 1069.4         | 1356.1            | 2537.6      | 2111.0 | 2115.5 | 2214.7 | 879.7  | 4644.0   |
| ADAS-Cog Recog.                |                 |                      |                 | 975.3          | 241.3             | 1179.9      | 3320.2 | 2891.7 | 2638.0 | 667.8  | 4134.2   |
| ADAS-Cog Total                 |                 |                      |                 |                | 1048.5            | 2986.5      | 3611.1 | 2043.3 | 1215.6 | 225.7  | 1898.3   |
| FCSRT Free Recall              |                 |                      |                 |                |                   | 862.9       | 2414.2 | 2225.1 | 2547.2 | 590.6  | 3405.0   |
| FCSRT Total                    |                 |                      |                 |                |                   |             | 1704.7 | 2973.4 | 5007.6 | 2046.3 | 10773.7  |
| FR                             |                 |                      |                 |                |                   |             |        | 1512.0 | 5084.7 | 2771.8 | 12535.1  |
| FCR                            |                 |                      |                 |                |                   |             |        |        | 1875.3 | 1417.7 | 5088.2   |
| CDR-sb                         |                 |                      |                 |                |                   |             |        |        |        | 1089.9 | 2798.9   |
| MMSE                           |                 |                      |                 |                |                   |             |        |        |        |        | 2079.9   |
| <i>R. Hippocampus - R&gt;N</i> |                 |                      |                 |                |                   |             |        |        |        |        |          |
| ADAS-Cog Recall                |                 | 3595.8               | 2296.9          | 875.2          | 669.6             | 824.5       | 1163.1 | 373.0  | 1419.9 | 417.3  | 2587.2   |
| ADAS-Cog Del. Recall           |                 |                      | 1649.6          | 1220.0         | 1903.2            | 2446.0      | 3614.9 | 3221.4 | 4508.3 | 2157.3 | 5826.5   |
| ADAS-Cog Recog.                |                 |                      |                 | 1025.9         | 1748.5            | 1618.0      | 3401.6 | 2538.9 | 2903.1 | 1959.2 | 2362.3   |
| ADAS-Cog Total                 |                 |                      |                 |                | 375.6             | 785.9       | 1931.0 | 947.8  | 2182.7 | 416.5  | 2476.0   |
| FCSRT Free Recall              |                 |                      |                 |                |                   | 331.0       | 1149.6 | 681.8  | 2740.1 | 163.4  | 4000.7   |
| FCSRT Total                    |                 |                      |                 |                |                   |             | 1152.7 | 1010.7 | 3263.3 | 584.6  | 3966.1   |
| FR                             |                 |                      |                 |                |                   |             |        | 1021.6 | 2880.1 | 767.8  | 4692.7   |
| FCR                            |                 |                      |                 |                |                   |             |        |        | 1296.9 | 327.3  | 3117.1   |
| CDR-sb                         |                 |                      |                 |                |                   |             |        |        |        | 1885.1 | 2249.3   |
| MMSE                           |                 |                      |                 |                |                   |             |        |        |        |        | 2978.1   |
| <i>L/R Hippocampus</i>         |                 |                      |                 |                |                   |             |        |        |        |        |          |
| N>R                            | 396.1           | 3339.6               | 2492.6          | 2094.5         | 1538.4            | 1731.4      | 1802.9 | 1685.4 | 1473.3 | 1453.0 |          |
| R>N                            | 1610.8          | 4547.5               | 1382.3          | 1374.9         | 2627.6            | 3444.7      | 1198.5 | 703.3  | 822.9  | 1940.0 |          |
| <i>N&gt;R/R&gt;N</i>           |                 |                      |                 |                |                   |             |        |        |        |        |          |
| L. Hippocampal Seed            | 2321.2          | 5171.5               | 5525.5          | 4310.1         | 4681.7            | 4323.9      | 6384.7 | 4779.8 | 4476.7 | 3630.7 |          |
| R. Hippocampal Seed            | 3292.7          | 8587.9               | 4084.9          | 3804.5         | 4738.0            | 8459.4      | 9300.0 | 5416.1 | 2820.2 | 3894.7 |          |

All Chi-square statistics are significant ( $p < 0.001$ ) after bonferroni correction (780 tests). The minimum statistic that would be significant at  $p < 0.001$  is 39.9584 for 7 degrees of freedom. Values are percentage of network that contains selected voxels. Red bolded values indicate values that are at or exceed the expected value from a uniform distribution across the brain. The expected value is 0.05, or 5% of each network. ADAS-Cog Del., ADAS-Cog Delayed Recall Score; ADAS-Cog Recog., ADAS-Cog Recognition Score; FCSRT Free Recall, Free-Cued and Selective Reminding Test Free Recall Score; FCSRT Total, Free-Cued and Selective Reminding Test Total Score; FR, Post-scan Free Recall; FCR, Post-scan Forced-Choice Recognition; CDR-sb, CDR Sum-of-Boxes; MMSE, Mini-Mental State Examination; L, Left; R, Right

**Table S10. Chi-Square Statistics for the top 1% of Voxel Radar Graph Shape Analysis**

|                                | ADAS-Cog Recall | ADAS-Cog Del. Recall | ADAS-Cog Recog. | ADAS-Cog Total | FCSRT Free Recall | FCSRT Total | FR     | FCR    | CDR-sb | MMSE   | Expected |
|--------------------------------|-----------------|----------------------|-----------------|----------------|-------------------|-------------|--------|--------|--------|--------|----------|
| <i>L. Hippocampus - N&gt;R</i> |                 |                      |                 |                |                   |             |        |        |        |        |          |
| ADAS-Cog Recall                |                 | 527.2                | 417.0           | 253.7          | 444.9             | 510.4       | 985.3  | 336.2  | 623.7  | 164.1  | 362.1    |
| ADAS-Cog Del. Recall           |                 |                      | 478.4           | 271.3          | 339.7             | 819.9       | 1287.8 | 269.3  | 1056.7 | 378.5  | 1003.1   |
| ADAS-Cog Recog.                |                 |                      |                 | 165.8          | 431.8             | 853.2       | 1394.7 | 790.7  | 821.1  | 254.6  | 1148.4   |
| ADAS-Cog Total                 |                 |                      |                 |                | 451.6             | 807.9       | 1099.4 | 473.1  | 881.3  | 245.6  | 955.8    |
| FCSRT Free Recall              |                 |                      |                 |                |                   | 303.2       | 1095.1 | 405.9  | 515.3  | 108.2  | 1299.6   |
| FCSRT Total                    |                 |                      |                 |                |                   |             | 610.3  | 516.1  | 818.8  | 369.0  | 1046.6   |
| FR                             |                 |                      |                 |                |                   |             |        | 940.4  | 1961.1 | 1114.3 | 2191.4   |
| FCR                            |                 |                      |                 |                |                   |             |        |        | 901.8  | 378.6  | 600.8    |
| CDR-sb                         |                 |                      |                 |                |                   |             |        |        |        | 369.3  | 2832.4   |
| MMSE                           |                 |                      |                 |                |                   |             |        |        |        |        | 846.0    |
| <i>L. Hippocampus - R&gt;N</i> |                 |                      |                 |                |                   |             |        |        |        |        |          |
| ADAS-Cog Recall                |                 | 478.4                | 473.9           | 93.9           | 369.7             | 331.3       | 798.4  | 965.5  | 940.9  | 64.0   | 402.9    |
| ADAS-Cog Del. Recall           |                 |                      | 999.9           | 440.8          | 936.6             | 887.7       | 1310.7 | 1376.7 | 1098.7 | 419.4  | 1201.2   |
| ADAS-Cog Recog.                |                 |                      |                 | 456.1          | 465.4             | 61.6        | 1727.4 | 1967.9 | 1731.9 | 655.2  | 2335.1   |
| ADAS-Cog Total                 |                 |                      |                 |                | 301.6             | 415.6       | 1091.5 | 1277.0 | 1168.2 | 46.0   | 864.0    |
| FCSRT Free Recall              |                 |                      |                 |                |                   | 418.5       | 1615.1 | 1798.5 | 1861.8 | 328.9  | 2233.5   |
| FCSRT Total                    |                 |                      |                 |                |                   |             | 1495.4 | 1726.7 | 1542.1 | 545.3  | 1840.7   |
| FR                             |                 |                      |                 |                |                   |             |        | 631.1  | 368.1  | 918.2  | 964.9    |
| FCR                            |                 |                      |                 |                |                   |             |        |        | 502.0  | 1035.7 | 1265.9   |
| CDR-sb                         |                 |                      |                 |                |                   |             |        |        |        | 1053.2 | 632.0    |
| MMSE                           |                 |                      |                 |                |                   |             |        |        |        |        | 575.5    |
| <i>R. Hippocampus - N&gt;R</i> |                 |                      |                 |                |                   |             |        |        |        |        |          |
| ADAS-Cog Recall                |                 | 619.7                | 897.3           | 172.5          | 744.5             | 2025.0      | 1936.6 | 1186.8 | 628.1  | 449.6  | 630.0    |
| ADAS-Cog Del. Recall           |                 |                      | 762.3           | 389.1          | 705.3             | 1513.5      | 1028.0 | 681.8  | 480.1  | 433.1  | 1311.3   |
| ADAS-Cog Recog.                |                 |                      |                 | 561.4          | 212.0             | 510.3       | 765.6  | 819.7  | 778.2  | 369.9  | 2201.8   |
| ADAS-Cog Total                 |                 |                      |                 |                | 561.3             | 1628.3      | 1418.8 | 678.6  | 309.0  | 197.8  | 494.7    |
| FCSRT Free Recall              |                 |                      |                 |                |                   | 547.9       | 747.2  | 686.5  | 760.3  | 279.9  | 1282.4   |
| FCSRT Total                    |                 |                      |                 |                |                   |             | 372.0  | 1008.3 | 1588.9 | 1087.1 | 6146.1   |
| FR                             |                 |                      |                 |                |                   |             |        | 524.0  | 1271.8 | 1027.5 | 4622.9   |
| FCR                            |                 |                      |                 |                |                   |             |        |        | 410.9  | 436.3  | 1488.2   |
| CDR-sb                         |                 |                      |                 |                |                   |             |        |        |        | 159.0  | 747.6    |
| MMSE                           |                 |                      |                 |                |                   |             |        |        |        |        | 544.7    |
| <i>R. Hippocampus - R&gt;N</i> |                 |                      |                 |                |                   |             |        |        |        |        |          |
| ADAS-Cog Recall                |                 | 1131.2               | 1006.1          | 335.9          | 216.6             | 128.4       | 179.5  | 147.1  | 791.9  | 102.3  | 965.3    |
| ADAS-Cog Del. Recall           |                 |                      | 700.1           | 386.9          | 679.4             | 1256.2      | 1212.2 | 1241.6 | 1139.5 | 909.7  | 1502.0   |
| ADAS-Cog Recog.                |                 |                      |                 | 497.8          | 751.3             | 963.9       | 1194.3 | 1188.5 | 808.8  | 905.6  | 665.6    |
| ADAS-Cog Total                 |                 |                      |                 |                | 165.0             | 494.5       | 493.1  | 467.9  | 757.0  | 232.1  | 633.5    |
| FCSRT Free Recall              |                 |                      |                 |                |                   | 292.0       | 511.3  | 326.9  | 980.5  | 255.2  | 1054.9   |
| FCSRT Total                    |                 |                      |                 |                |                   |             | 202.6  | 268.9  | 1104.8 | 177.9  | 1215.4   |
| FR                             |                 |                      |                 |                |                   |             |        | 398.5  | 1123.3 | 158.4  | 1387.6   |
| FCR                            |                 |                      |                 |                |                   |             |        |        | 826.8  | 151.0  | 1545.8   |
| CDR-sb                         |                 |                      |                 |                |                   |             |        |        |        | 787.5  | 988.4    |
| MMSE                           |                 |                      |                 |                |                   |             |        |        |        |        | 922.2    |
| <i>L/R Hippocampus</i>         |                 |                      |                 |                |                   |             |        |        |        |        |          |
| N>R                            | 189.9           | 731.6                | 1281.4          | 575.3          | 513.8             | 785.3       | 836.6  | 565.4  | 703.4  | 405.4  |          |
| R>N                            | 666.6           | 1382.7               | 409.0           | 580.8          | 1038.0            | 1409.8      | 559.1  | 203.1  | 358.1  | 749.7  |          |
| <i>N&gt;R/R&gt;N</i>           |                 |                      |                 |                |                   |             |        |        |        |        |          |
| L. Hippocampal Seed            | 401.4           | 1183.9               | 1813.7          | 1263.8         | 1359.6            | 1154.1      | 1020.2 | 994.2  | 1448.8 | 863.3  |          |
| R. Hippocampal Seed            | 686.3           | 2184.5               | 1139.1          | 787.9          | 1270.0            | 2416.9      | 2446.5 | 1554.8 | 859.2  | 855.3  |          |

All Chi-square statistics are significant ( $p < 0.001$ ) after bonferroni correction (780 tests). The minimum statistic that would be significant at  $p < 0.001$  is 39.9584 for 7 degrees of freedom. Values are percentage of network that contains selected voxels. Red bolded values indicate values that are at or exceed the expected value from a uniform distribution across the brain. The expected value is 0.01, or 1% of each network. ADAS-Cog Del., ADAS-Cog Delayed Recall Score; ADAS-Cog Recog., ADAS-Cog Recognition Score; FCSRT Free Recall, Free-Cued and Selective Reminding Test Free Recall Score; FCSRT Total, Free-Cued and Selective Reminding Test Total Score; FR, Post-scan Free Recall; FCR, Post-scan Forced-Choice Recognition; CDR-sb, CDR Sum-of-Boxes; MMSE, Mini-Mental State Examination; L, Left; R, Right



**Table S11. Significant N>R Correlation with Performance Difference Between Seeds**

| <i>Clinical/Cognitive Measure</i> | <i>Cluster Size</i> | <i>Peak Z-difference</i> | <i>Peak X,Y,Z</i> | <i>Region</i>                                 |
|-----------------------------------|---------------------|--------------------------|-------------------|-----------------------------------------------|
| <i>Left&gt;Right</i>              |                     |                          |                   |                                               |
| <i>ADAS-Cog Recog.</i>            |                     |                          |                   |                                               |
|                                   | 2522                | 3.97                     | -22,-58,54        | L. Superior Parietal Lobule                   |
|                                   |                     | 3.76                     | -10,-40,30        | L. Posterior Cingulate Cortex                 |
|                                   |                     | 3.74                     | -24,-32,48        | L. Postcentral Gyrus                          |
|                                   |                     | 3.70                     | -22,-40,46        | L. Postcentral Gyrus                          |
|                                   |                     | 3.62                     | -44,-70,26        | L. Angular Gyrus                              |
|                                   |                     | 3.47                     | -20,-14,58        | L. Precentral Gyrus                           |
|                                   |                     | 3.45                     | -20,-48,46        | L. Superior Parietal Lobule                   |
|                                   |                     | 3.41                     | -20,-28,58        | L. Precentral Gyrus                           |
|                                   |                     | 3.40                     | 24,-60,40         | R. Superior Occipital Gyrus                   |
|                                   |                     | 3.38                     | 0,-46,36          | L. Middle Cingulate Cortex                    |
|                                   |                     | 3.28                     | -44,-68,38        | L. Angular Gyrus                              |
|                                   |                     | 3.24                     | -30,-36,58        | L. Postcentral Gyrus                          |
|                                   |                     | 3.22                     | 12,-58,48         | R. Precuneus                                  |
|                                   |                     | 3.09                     | -6,-10,46         | L. Middle Cingulate Cortex                    |
|                                   |                     | 3.09                     | -66,-48,18        | L. Superior Temporal Sulcus                   |
|                                   |                     | 3.03                     | -56,-58,24        | L. Angular Gyrus                              |
|                                   |                     | 3.02                     | 8,-10,38          | R. Middle Cingulate Cortex                    |
|                                   |                     | 3.02                     | -48,-58,20        | L. Middle Cingulate Cortex                    |
|                                   |                     | 2.98                     | -26,-56,38        | L. Inferior Parietal Lobule                   |
|                                   |                     | 2.90                     | 0,-44,48          | L. Middle Cingulate Cortex                    |
|                                   |                     | 2.85                     | 6,-20,52          | R. Supplementary Motor Area                   |
|                                   |                     | 2.80                     | -32,-56,28        | L. Angular Gyrus                              |
|                                   |                     | 2.64                     | -4,4,56           | L. Supplementary Motor Area                   |
|                                   |                     | 2.57                     | -6,4,40           | L. Middle Cingulate Cortex                    |
|                                   |                     | 2.52                     | 4,-52,46          | R. Precuneus                                  |
|                                   |                     | 2.44                     | 2,-22,44          | R. Middle Cingulate Cortex                    |
|                                   |                     | 2.38                     | 12,-20,36         | R. Middle Cingulate Cortex                    |
|                                   | 827                 | 3.83                     | 40,42,32          | R. Middle Frontal Gyrus                       |
|                                   |                     | 3.66                     | 36,24,52          | R. Middle Frontal Gyrus                       |
|                                   |                     | 3.61                     | 32,32,46          | R. Middle Frontal Gyrus                       |
|                                   |                     | 3.01                     | 52,26,28          | R. Inferior Frontal Gyrus - pars triangularis |
|                                   | 246                 | 3.55                     | 14,28,62          | R. Medial Superior Frontal Gyrus              |
|                                   |                     | 2.74                     | 26,14,66          | R. Superior Frontal Gyrus                     |
|                                   |                     | 2.68                     | 12,40,52          | R. Medial Superior Frontal Gyrus              |
|                                   | 205                 | 3.47                     | 10,-6,58          | R. Supplementary Motor Area                   |
|                                   |                     | 2.60                     | 20,-18,66         | R. Precentral Gyrus                           |
|                                   | 194                 | 3.08                     | 38,-32,38         | R. Supramarginal Gyrus                        |
|                                   |                     | 2.74                     | 22,-40,40         | R. Middle Cingulate Cortex                    |
|                                   | 757                 | 2.99                     | -22,-28,14        | L. Thalamus                                   |
|                                   |                     | 2.95                     | -40,-18,36        | L. Postcentral Gyrus                          |
|                                   |                     | 2.95                     | -14,-40,10        | L. Hippocampus                                |

|                       |      |             |                                  |
|-----------------------|------|-------------|----------------------------------|
|                       | 2.94 | -42,-32,46  | L. Postcentral Gyrus             |
|                       | 2.92 | -30,-32,14  | L. Heschl's Gyrus                |
|                       | 2.65 | -32,-22,22  | L. Insula                        |
|                       | 2.60 | -56,-26,46  | L. Inferior Parietal Lobule      |
| <i>ADAS-Cog Total</i> |      |             |                                  |
| 670                   | 3.78 | -10,-40,28  | L. Posterior Cingulate Cortex    |
|                       | 3.26 | -24,-58,38  | L. Middle Occipital Gyrus        |
|                       | 3.14 | -20,-56,50  | L. Superior Parietal Lobule      |
|                       | 3.00 | -24,-34,46  | L. Postcentral Gyrus             |
|                       | 2.94 | -14,-40,14  | L. Posterior Cingulate Cortex    |
|                       | 2.86 | -20,-26,14  | L. Thalamus                      |
|                       | 2.76 | -14,-38,38  | L. Middle Cingulate Cortex       |
|                       | 2.74 | 0,-46,36    | L. Middle Cingulate Cortex       |
|                       | 2.70 | -30,-56,28  | L. Angular Gyrus                 |
| 202                   | 3.15 | -46,-58,22  | L. Middle Temporal Gyrus         |
|                       | 2.79 | -46,-48,0   | L. Middle Temporal Gyrus         |
|                       | 2.73 | -46,-56,8   | L. Middle Temporal Gyrus         |
| 305                   | 2.89 | 28,-40,22   | White Matter                     |
|                       | 2.84 | 26,-48,24   | R. Precuneus                     |
|                       | 2.79 | 16,-40,14   | R. Posterior Cingulate Cortex    |
|                       | 2.77 | 22,-56,22   | R. Precuneus                     |
|                       | 2.72 | 22,-58,12   | R. Calcarine Sulcus              |
| <i>FCSRT Free</i>     |      |             |                                  |
| 176                   | 3.36 | 26,30,48    | R. Superior Frontal Gyrus        |
| 368                   | 2.94 | 30,-36,22   | White Matter                     |
|                       | 2.93 | 18,-38,18   | R. Posterior Cingulate Cortex    |
|                       | 2.88 | 22,-54,20   | R. Precuneus                     |
|                       | 2.40 | 28,-64,16   | R. Calcarine Sulcus              |
| <i>FCSRT Total</i>    |      |             |                                  |
| 420                   | 3.83 | 32,32,46    | R. Middle Frontal Gyrus          |
|                       | 3.62 | 40,42,32    | R. Middle Frontal Gyrus          |
|                       | 3.04 | 34,22,52    | R. Middle Frontal Gyrus          |
| 183                   | 3.20 | 16,20,58    | R. Superior Frontal Gyrus        |
|                       | 3.02 | 12,32,60    | R. Medial Superior Frontal Gyrus |
|                       | 2.69 | 26,14,66    | R. Superior Frontal Gyrus        |
| 207                   | 3.18 | -42,-36,-12 | L. Inferior Temporal Gyrus       |
|                       | 3.17 | -46,-44,-4  | L. Middle Temporal Gyrus         |
|                       | 3.06 | -36,-26,-22 | L. Fusiform Gyrus                |
| 198                   | 3.13 | -22,-28,48  | L. Precentral Gyrus              |
|                       | 2.74 | -22,-40,46  | L. Postcentral Gyrus             |
|                       | 2.71 | -18,-28,56  | L. Precentral Gyrus              |
| <i>CDR-sb</i>         |      |             |                                  |
| 195                   | 3.81 | 34,-38,48   | R. Supramarginal Gyrus           |

|                             |      |      |             |                                          |
|-----------------------------|------|------|-------------|------------------------------------------|
|                             |      | 2.93 | 38,-48,52   | R. Inferior Parietal Lobule              |
| <i>MMSE</i>                 |      |      |             |                                          |
|                             | 319  | 3.11 | 22,-54,22   | R. Precuneus                             |
|                             |      | 3.11 | 16,-42,18   | R. Posterior Cingulate                   |
|                             |      | 2.78 | 28,-40,22   | White Matter                             |
| <b><i>Right&gt;Left</i></b> |      |      |             |                                          |
| <i>ADAS-Cog Recall</i>      |      |      |             |                                          |
|                             | 569  | 4.15 | 12,-18,-26  | R. Parahippocampal Gyrus                 |
|                             |      | 3.87 | -12,-16,-26 | L. Parahippocampal Gyrus                 |
|                             |      | 3.42 | -18,-22,-24 | L. Parahippocampal Gyrus                 |
|                             |      | 3.31 | -4,-14,-30  | Brainstem                                |
|                             |      | 3.27 | 18,-2,-14   | R. Amygdala                              |
|                             |      | 3.06 | 26,0,-40    | R. Fusiform Gyrus                        |
|                             |      | 2.66 | 20,-8,-24   | R. Parahippocampal Gyrus                 |
|                             |      | 2.63 | 18,6,-14    | R. Olfactory Sulcus                      |
| <i>ADAS-Cog Total</i>       |      |      |             |                                          |
|                             | 516  | 4.25 | 12,-18,-28  | R. Parahippocampal Gyrus                 |
|                             |      | 4.09 | -14,-16,-26 | L. Parahippocampal Gyrus                 |
|                             |      | 3.41 | -2,-12,-32  | Brainstem                                |
|                             |      | 3.26 | 22,-2,-36   | R. Parahippocampal Gyrus                 |
|                             |      | 2.99 | 18,-10,-26  | R. Parahippocampal Gyrus                 |
| <i>FCSRT Free</i>           |      |      |             |                                          |
|                             | 292  | 4.99 | 24,14,-24   | R. Inferior Frontal Gyrus - orbital part |
|                             |      | 3.78 | 18,38,-16   | R. Superior Frontal Gyrus - orbital part |
|                             |      | 3.39 | 20,8,-30    | R. Parahippocampal Gyrus                 |
|                             |      | 3.10 | 34,40,-22   | R. Inferior Frontal Gyrus - orbital part |
|                             |      | 2.85 | 18,30,-14   | R. Superior Frontal Gyrus - orbital part |
|                             | 1429 | 4.88 | -28,34,-20  | R. Middle Frontal Gyrus - orbital part   |
|                             |      | 4.42 | -24,48,-18  | R. Middle Frontal Gyrus - orbital part   |
|                             |      | 4.32 | -24,18,-22  | R. Middle Frontal Gyrus - orbital part   |
|                             |      | 4.10 | -18,26,-10  | L. Superior Frontal Gyrus - orbital part |
|                             |      | 3.80 | -10,40,-4   | L. Anterior Cingulate Cortex             |
|                             |      | 3.62 | 4,20,-6     | R. Olfactory Sulcus                      |
|                             |      | 3.59 | 6,52,-8     | L. Middle Frontal Gyrus - orbital part   |
|                             |      | 3.58 | -10,50,-8   | L. Middle Frontal Gyrus - orbital part   |
|                             |      | 2.99 | 14,18,-10   | R. Caudate                               |
|                             |      | 2.88 | 14,8,-2     | R. Pallidum                              |
|                             |      | 2.70 | -18,12,-10  | L. Putamen                               |
|                             |      | 2.65 | -12,6,-2    | L. Pallidum                              |
|                             |      | 2.63 | 4,40,-6     | L. Middle Frontal Gyrus - orbital part   |
|                             |      | 2.63 | -16,10,-18  | L. Olfactory Sulcus                      |
|                             |      | 2.60 | 12,26,-10   | R. Gyrus Rectus                          |
|                             | 655  | 3.97 | -14,-12,-26 | L. Parahippocampal Gyrus                 |

|     |      |             |                             |
|-----|------|-------------|-----------------------------|
|     | 3.58 | -12,-34,-32 | L. Cerebellum               |
|     | 3.48 | 10,-16,-28  | Brainstem                   |
|     | 3.45 | -12,-22,-30 | L. Parahippocampal Gyrus    |
|     | 3.04 | -4,-12,-28  | Brainstem                   |
|     | 2.57 | 18,-10,-26  | R. Parahippocampal Gyrus    |
| 195 | 3.85 | -10,-88,44  | L. Superior Occipital Gyrus |
|     | 3.60 | -10,-94,32  | L. Cuneus                   |
|     | 2.74 | -18,-98,30  | L. Superior Occipital Gyrus |
|     | 2.63 | -22,-86,48  | L. Superior Occipital Gyrus |
| 204 | 3.64 | -2,-72,-6   | L. Cerebellum               |

*FCSRT Total*

|     |      |             |                          |
|-----|------|-------------|--------------------------|
| 288 | 4.64 | -14,-16,-26 | L. Parahippocampal Gyrus |
|     | 3.16 | -14,-34,-34 | L. Cerebellum            |
| 199 | 4.04 | 10,-18,-28  | Brainstem                |
|     | 2.83 | 26,-4,-14   | R. Amygdala              |

*FCR*

|     |      |         |             |
|-----|------|---------|-------------|
| 178 | 3.80 | 18,6,-4 | R. Pallidum |
|-----|------|---------|-------------|

---

ADAS-Cog Del., ADAS-Cog Delayed Recall Score; ADAS-Cog Recog., ADAS-Cog Recognition Score; FCSRT Free Recall, Free-Cued and Selective Reminding Test Free Recall Score; FCSRT Total, Free-Cued and Selective Reminding Test Total Score; FR, Post-scan Free Recall; FCR, Post-scan Forced-Choice Recognition; CDR-sb, CDR Sum-of-Boxes; MMSE, Mini-Mental State Examination; Med., Medial; R., Right; L., Left

---
