# Supplementary material
Source: PubMed Central journal article supplement (PMC4154596)
Supplement: NIHMS606442-supplement-5.pdf [file NIHMS606442-supplement-5.pdf]

## Left Hemisphere

Lateral

Medial

## Right Hemisphere

Medial

Lateral

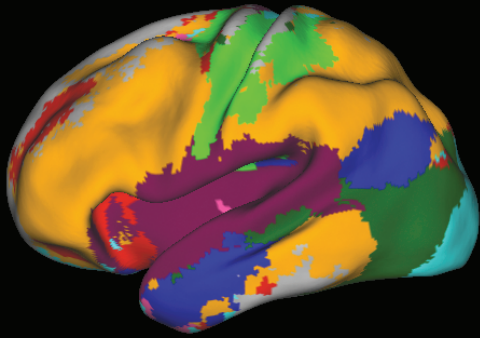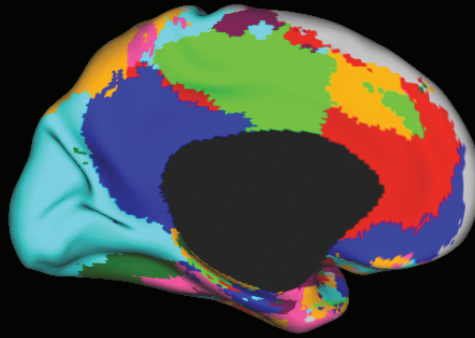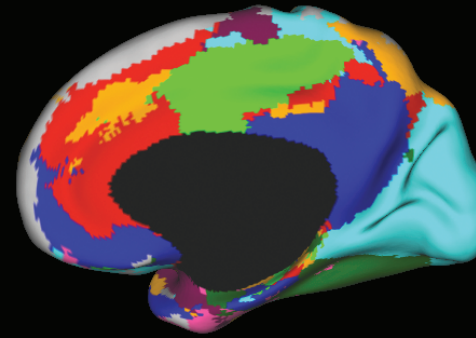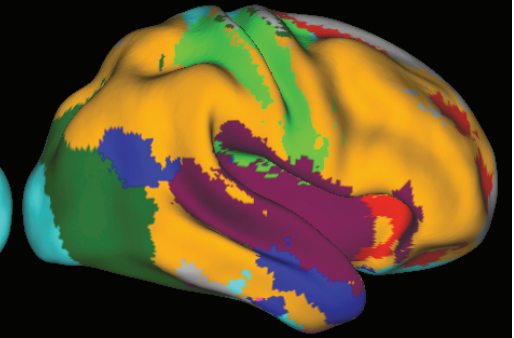

 A. Medial Visual

 C. Default-Mode

 E. Sensorimotor

 G. Executive Control

 B. Lateral Visual

 D. Cerebellum

 F. Auditory

 H. Frontoparietal
