# Supplementary material
Source: PubMed Central journal article supplement (PMC4154596)
Supplement: NIHMS606442-supplement-6.pdf [file NIHMS606442-supplement-6.pdf]

25% of Voxels

5% of Voxels

1% of Voxels

ADAS-Cog  
Recall

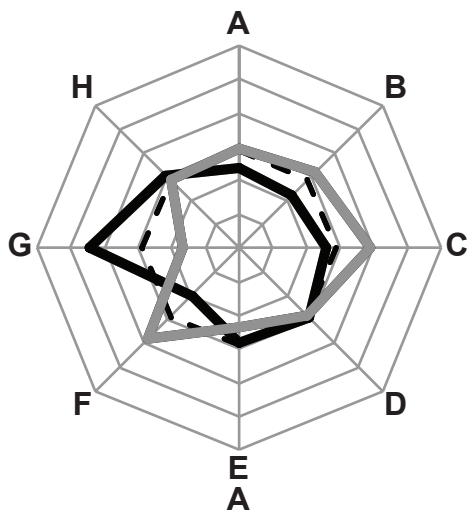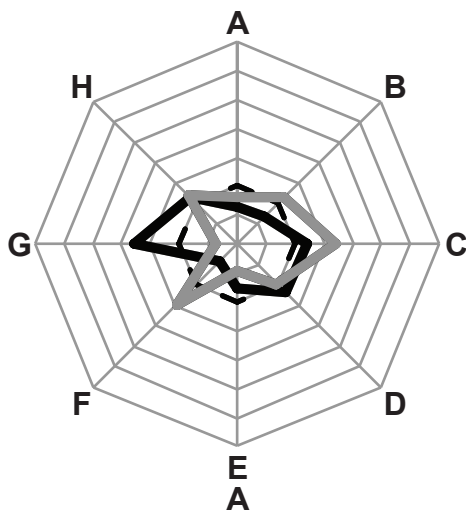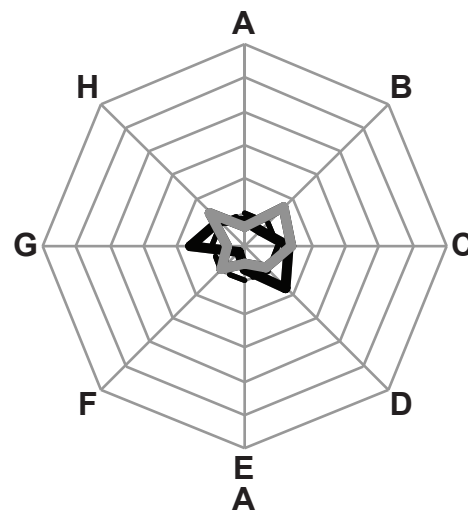

ADAS-Cog  
Delayed Recall

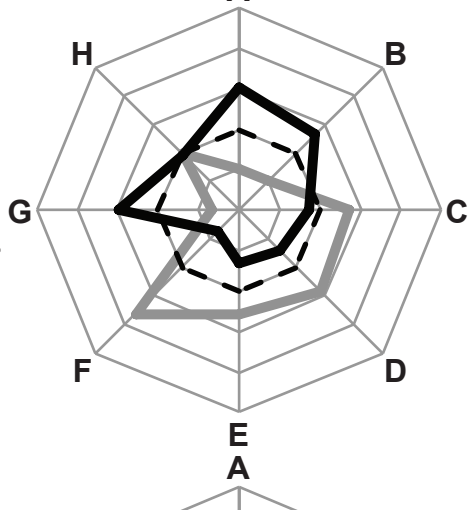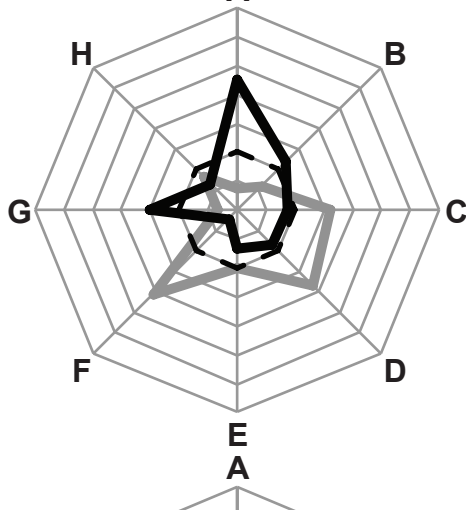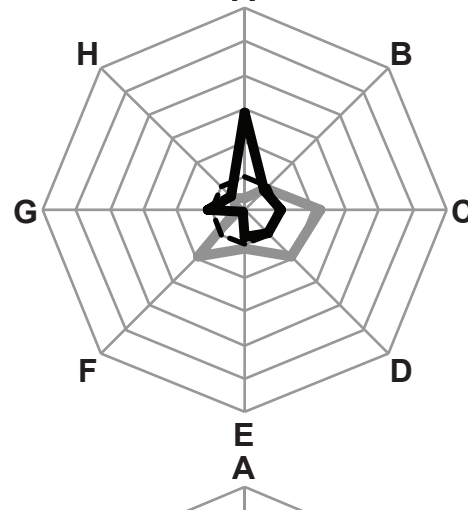

ADAS-Cog  
Recognition

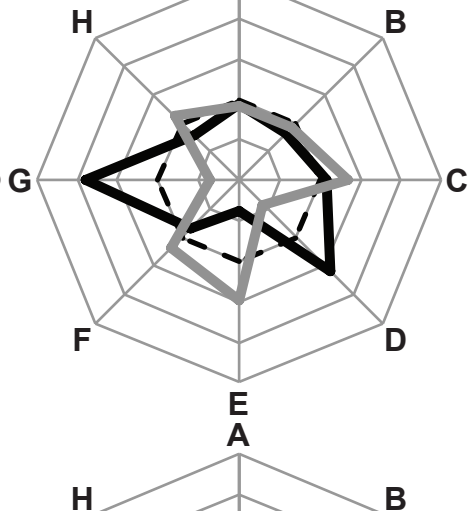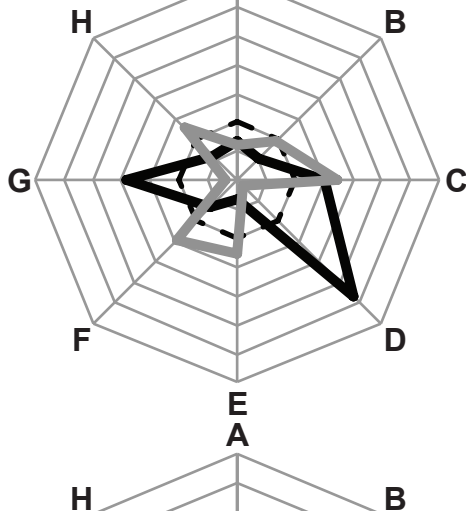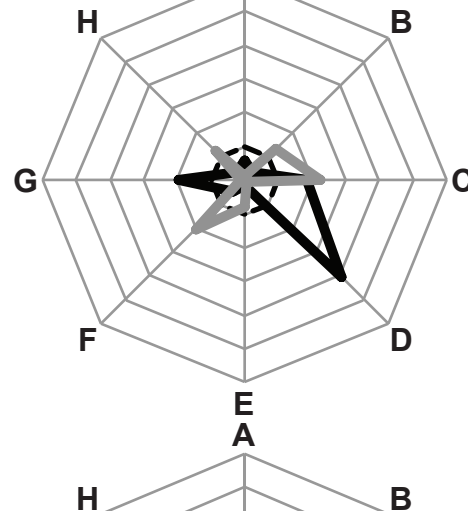

ADAS-Cog  
Total

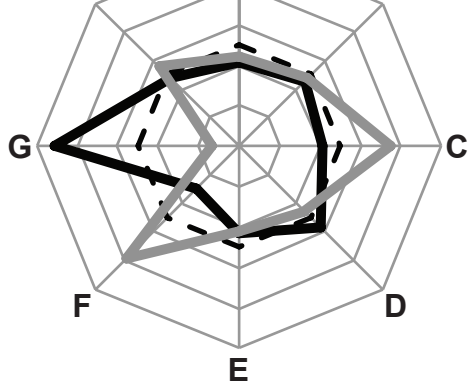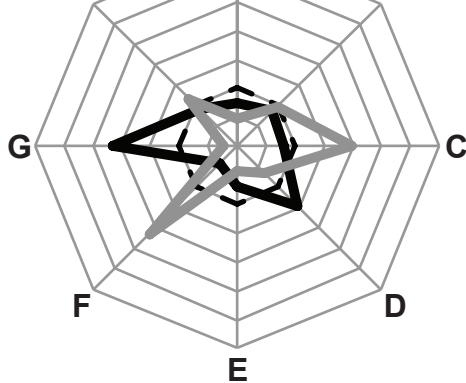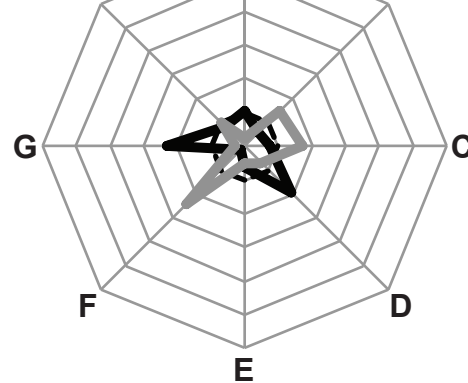

■ R>N Correlations    ■ N>R Correlations
