# Supplementary material
Source: PubMed Central journal article supplement (PMC4154596)
Supplement: NIHMS606442-supplement-7.pdf [file NIHMS606442-supplement-7.pdf]

25% of Voxels

5% of Voxels

1% of Voxels

FCSRT  
Free Recall

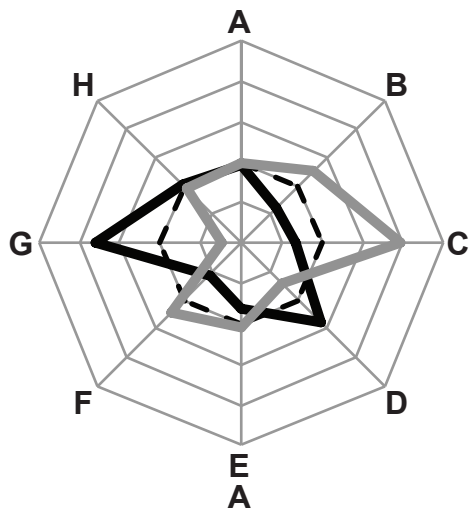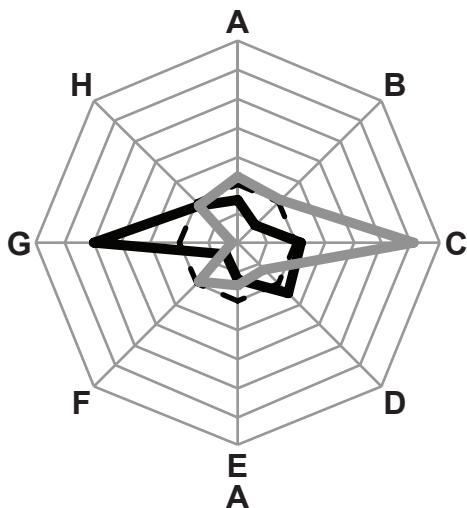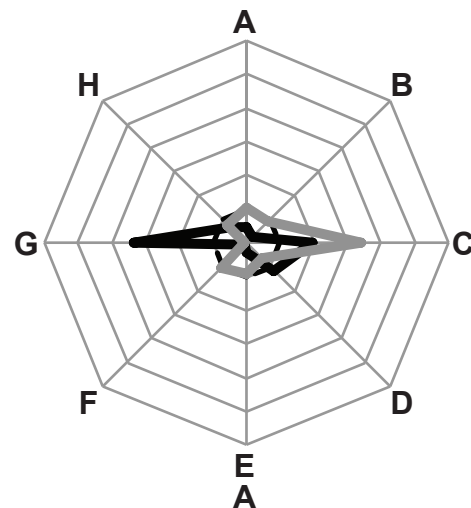

FCSRT  
Total

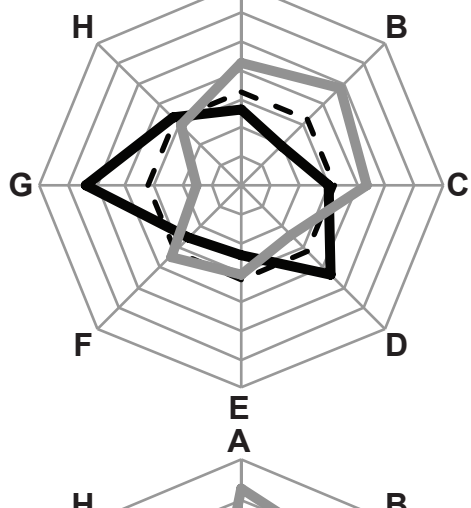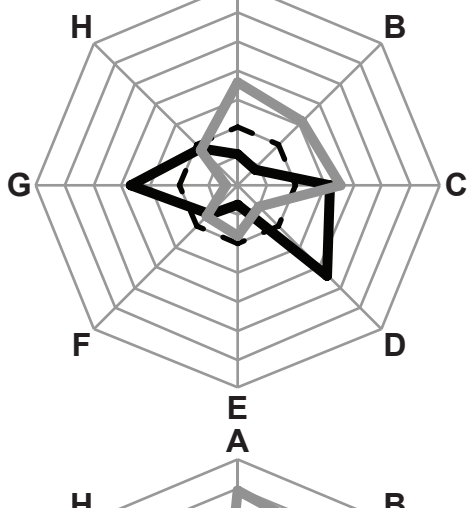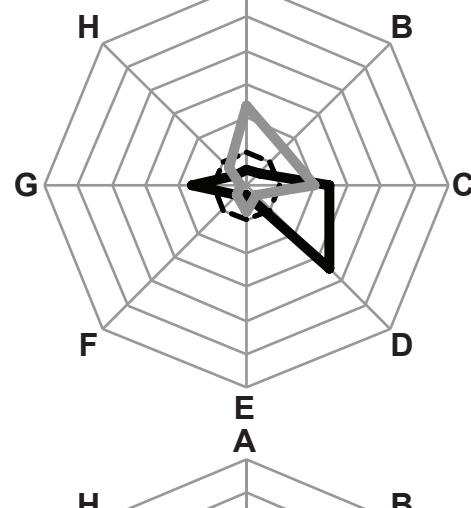

FR

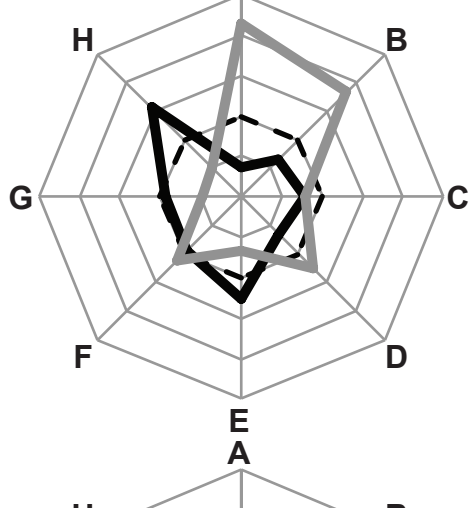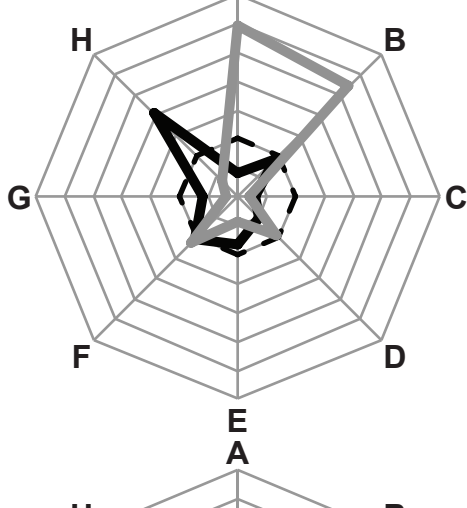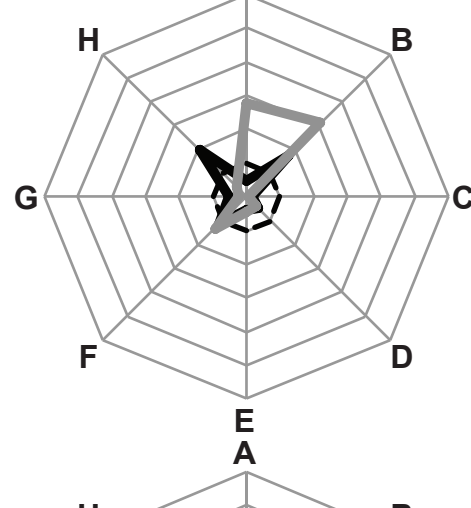

FCR

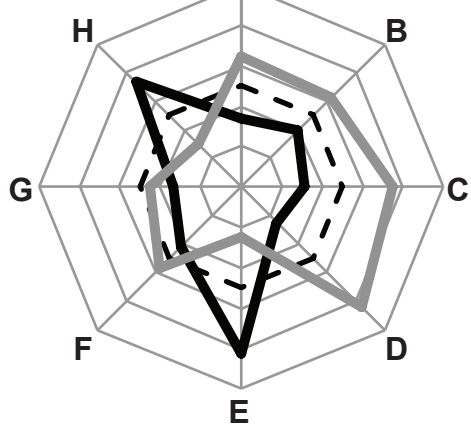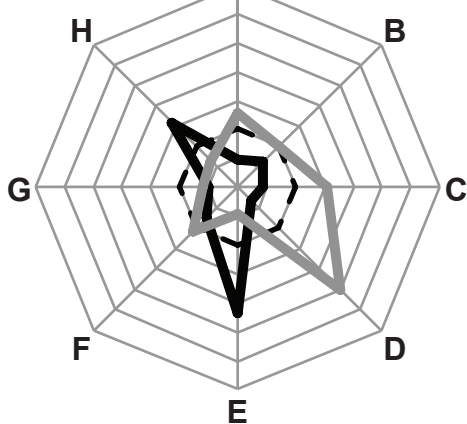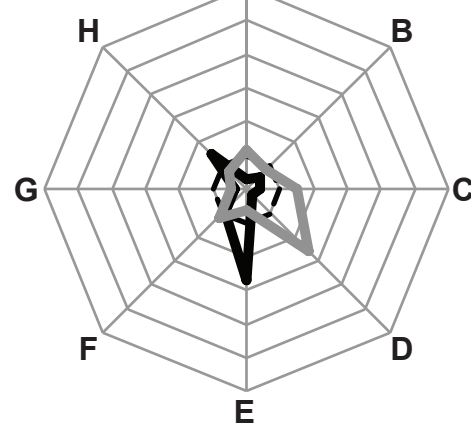

R>N Correlations
  N>R Correlations
