# Supplementary material
Source: PubMed Central journal article supplement (PMC4154596)
Supplement: NIHMS606442-supplement-8.pdf [file NIHMS606442-supplement-8.pdf]

25% of Voxels

5% of Voxels

1% of Voxels

ADAS-Cog  
Recall

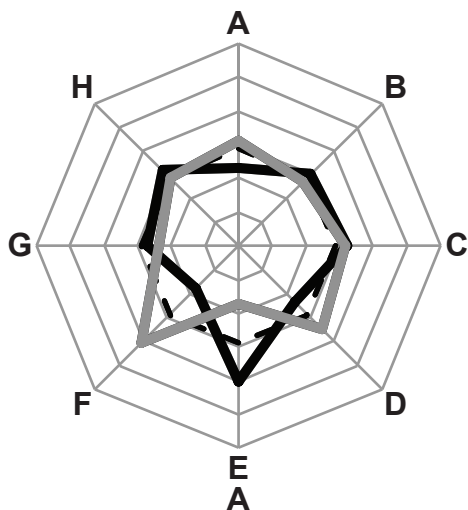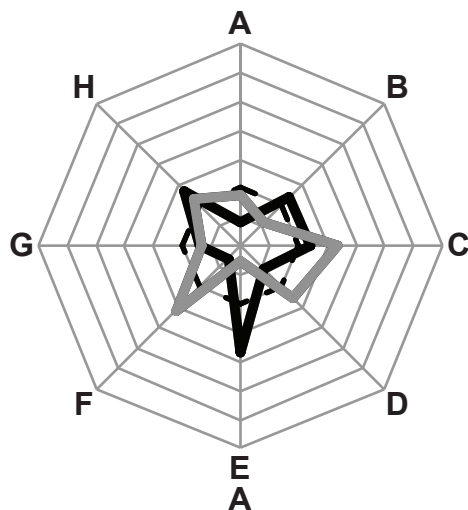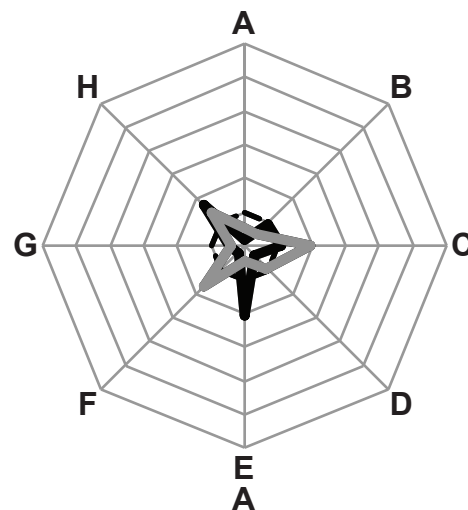

ADAS-Cog  
Delayed Recall

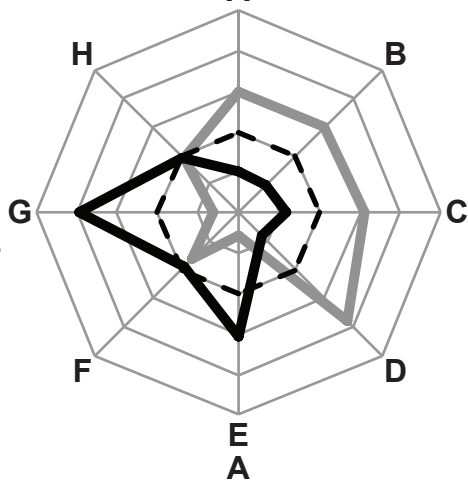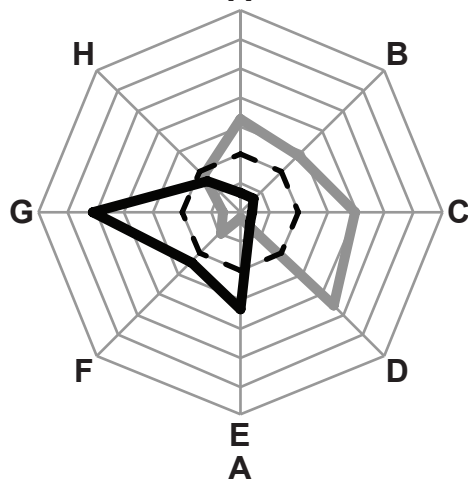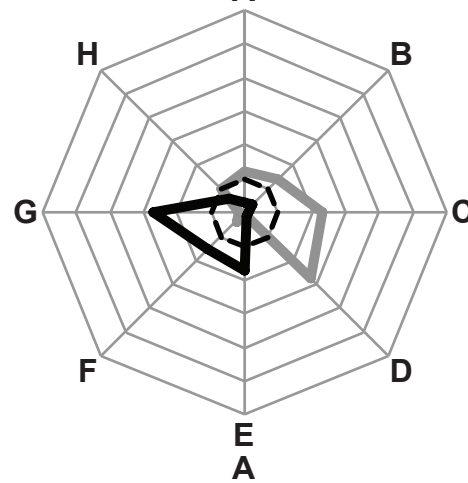

ADAS-Cog  
Recognition

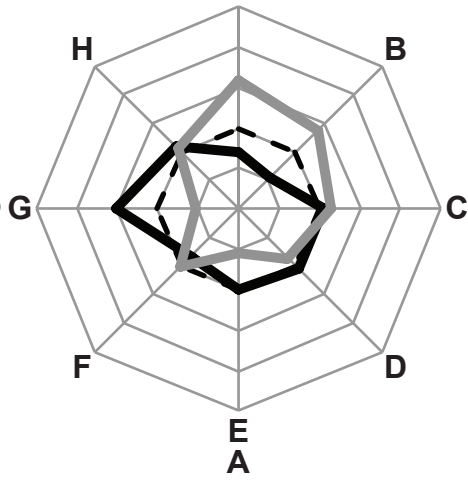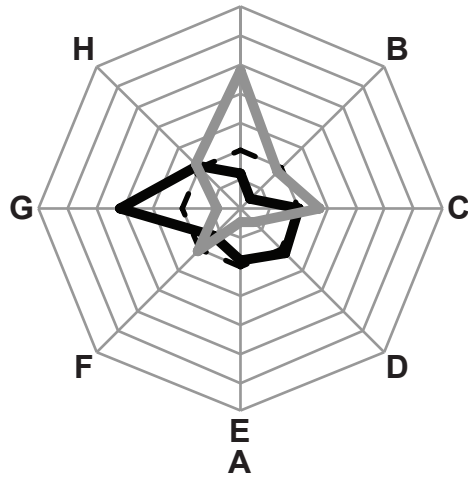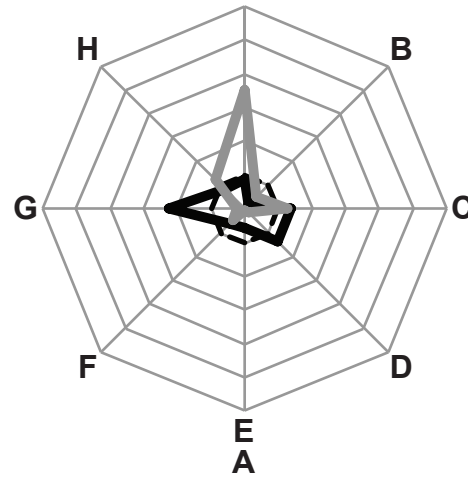

ADAS-Cog  
Total

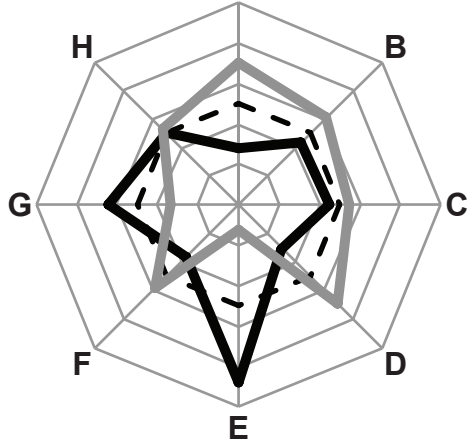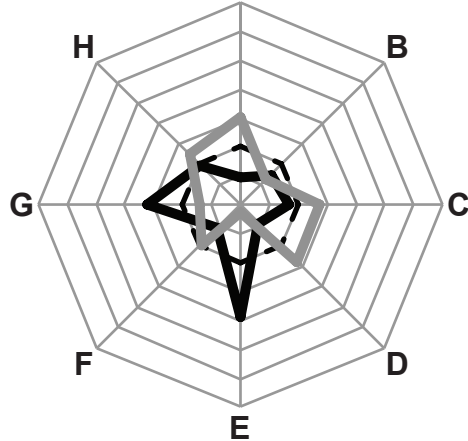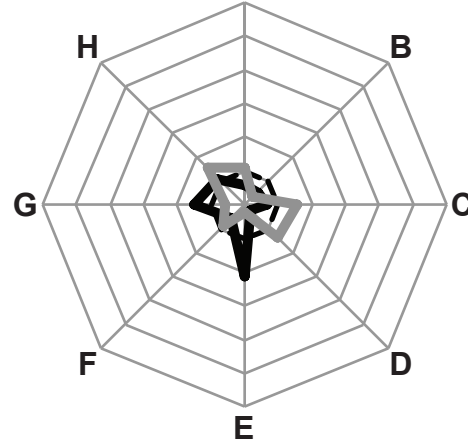

R>N Correlations
  N>R Correlations
