# Supplementary material
Source: PubMed Central journal article supplement (PMC4154596)
Supplement: NIHMS606442-supplement-9.pdf [file NIHMS606442-supplement-9.pdf]

25% of Voxels

5% of Voxels

1% of Voxels

FCSRT  
Free Recall

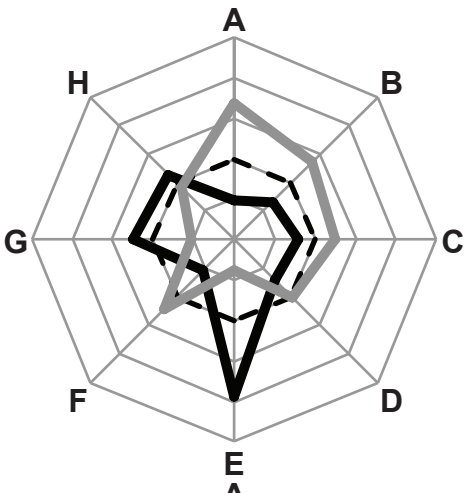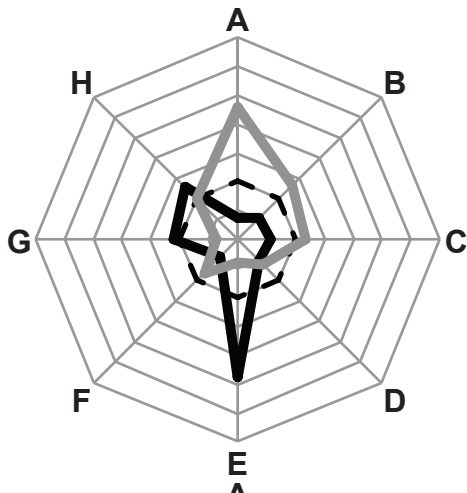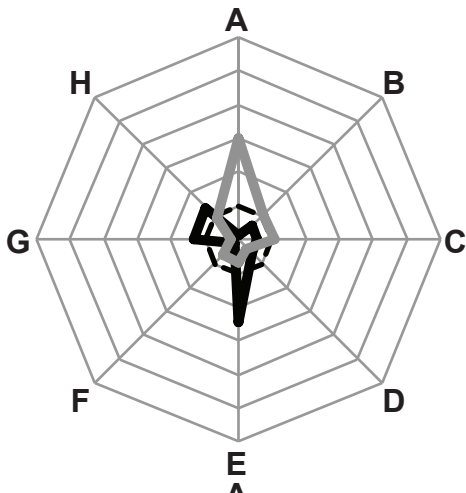

FCSRT  
Total

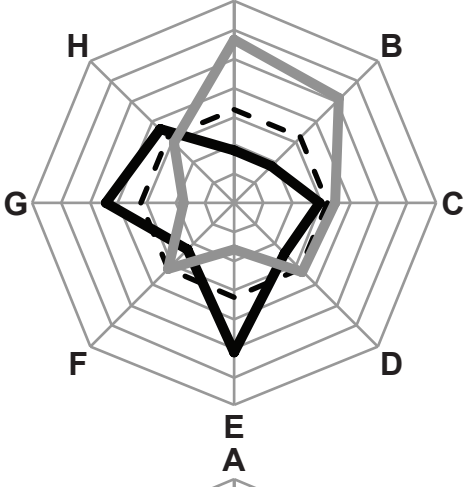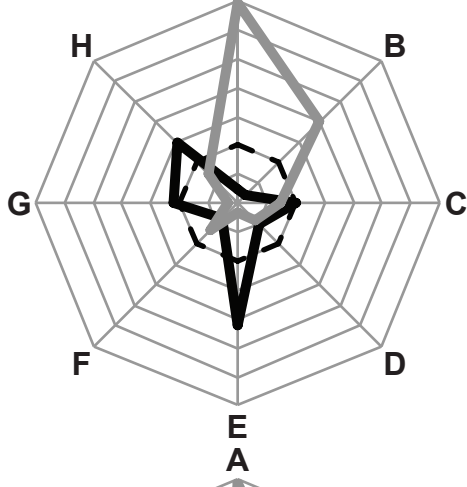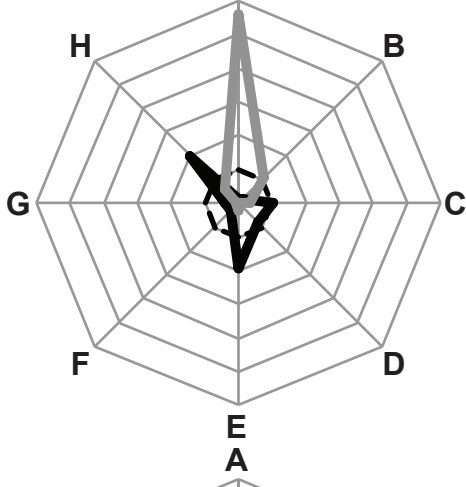

FR

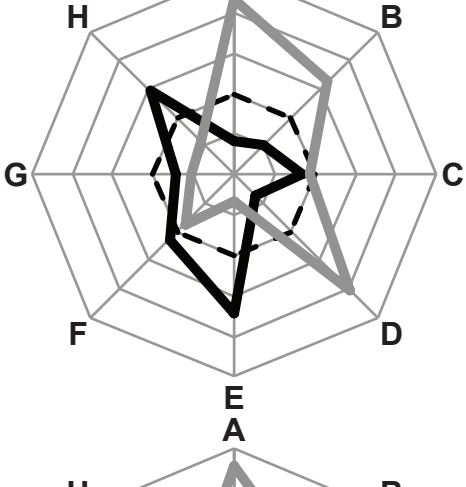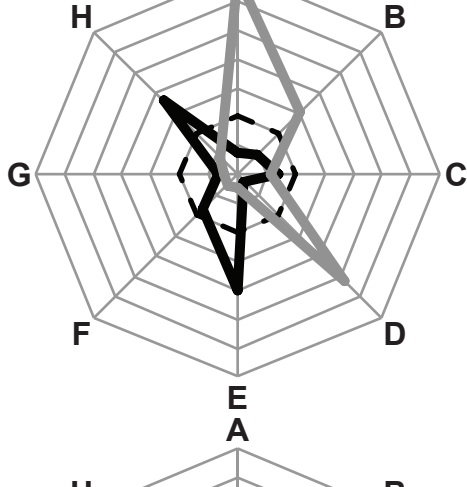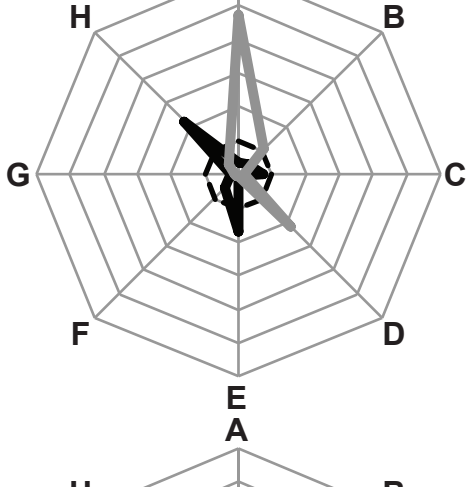

FCR

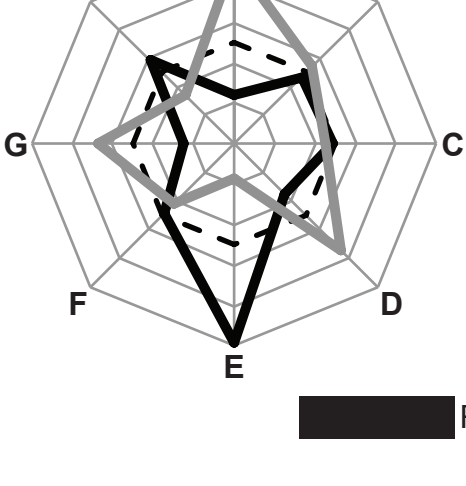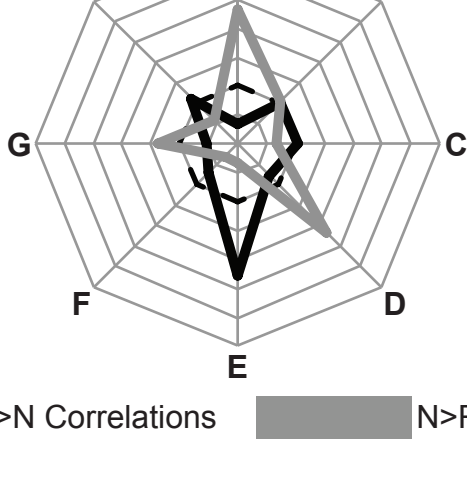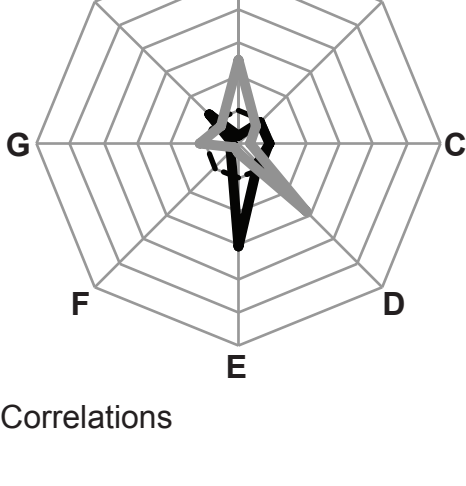

■ R>N Correlations    ■ N>R Correlations
