# Supplementary material
Source: PubMed Central journal article supplement (PMC4154596)

25% of Voxels

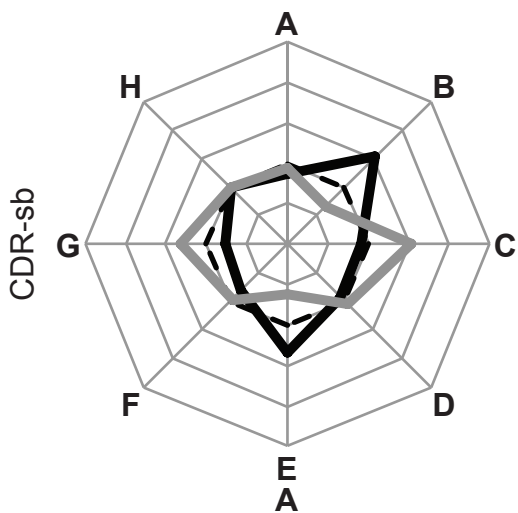

5% of Voxels

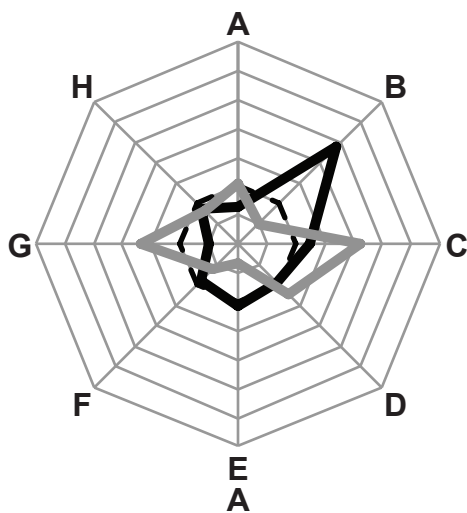

1% of Voxels

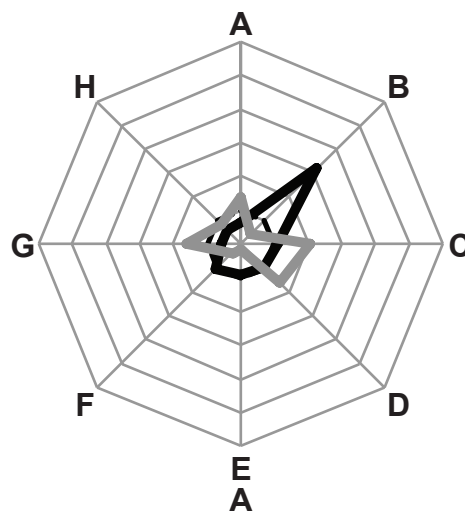

CDR-sb

MMSE

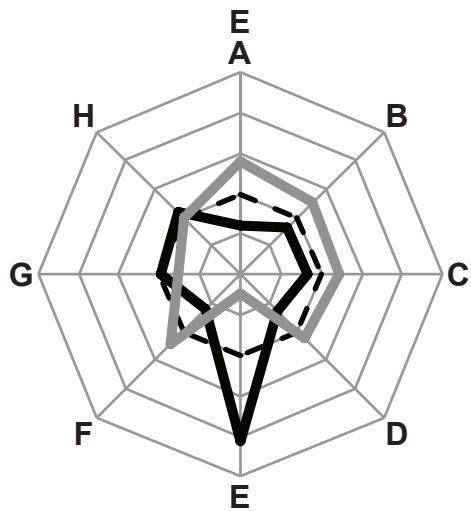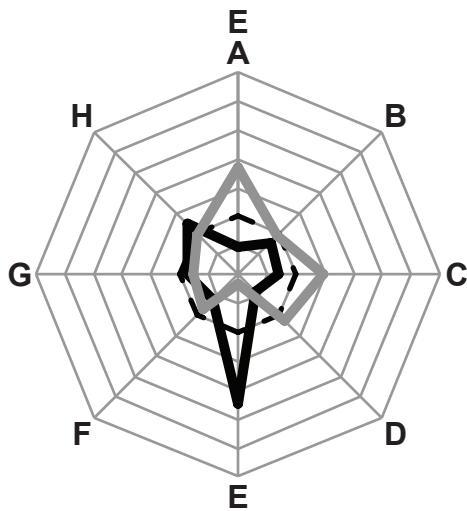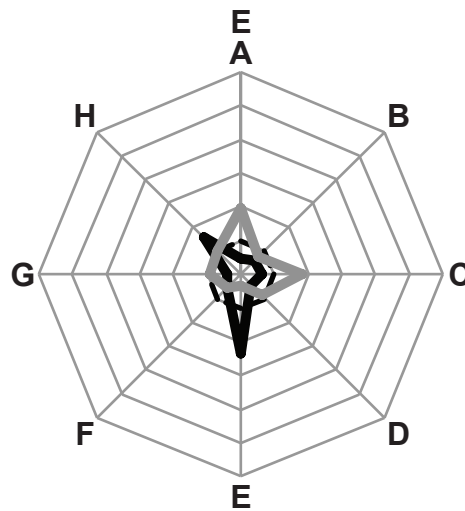

 R>N Correlations  N>R Correlations

Supplement: NIHMS606442-supplement-10.pdf [file NIHMS606442-supplement-10.pdf]

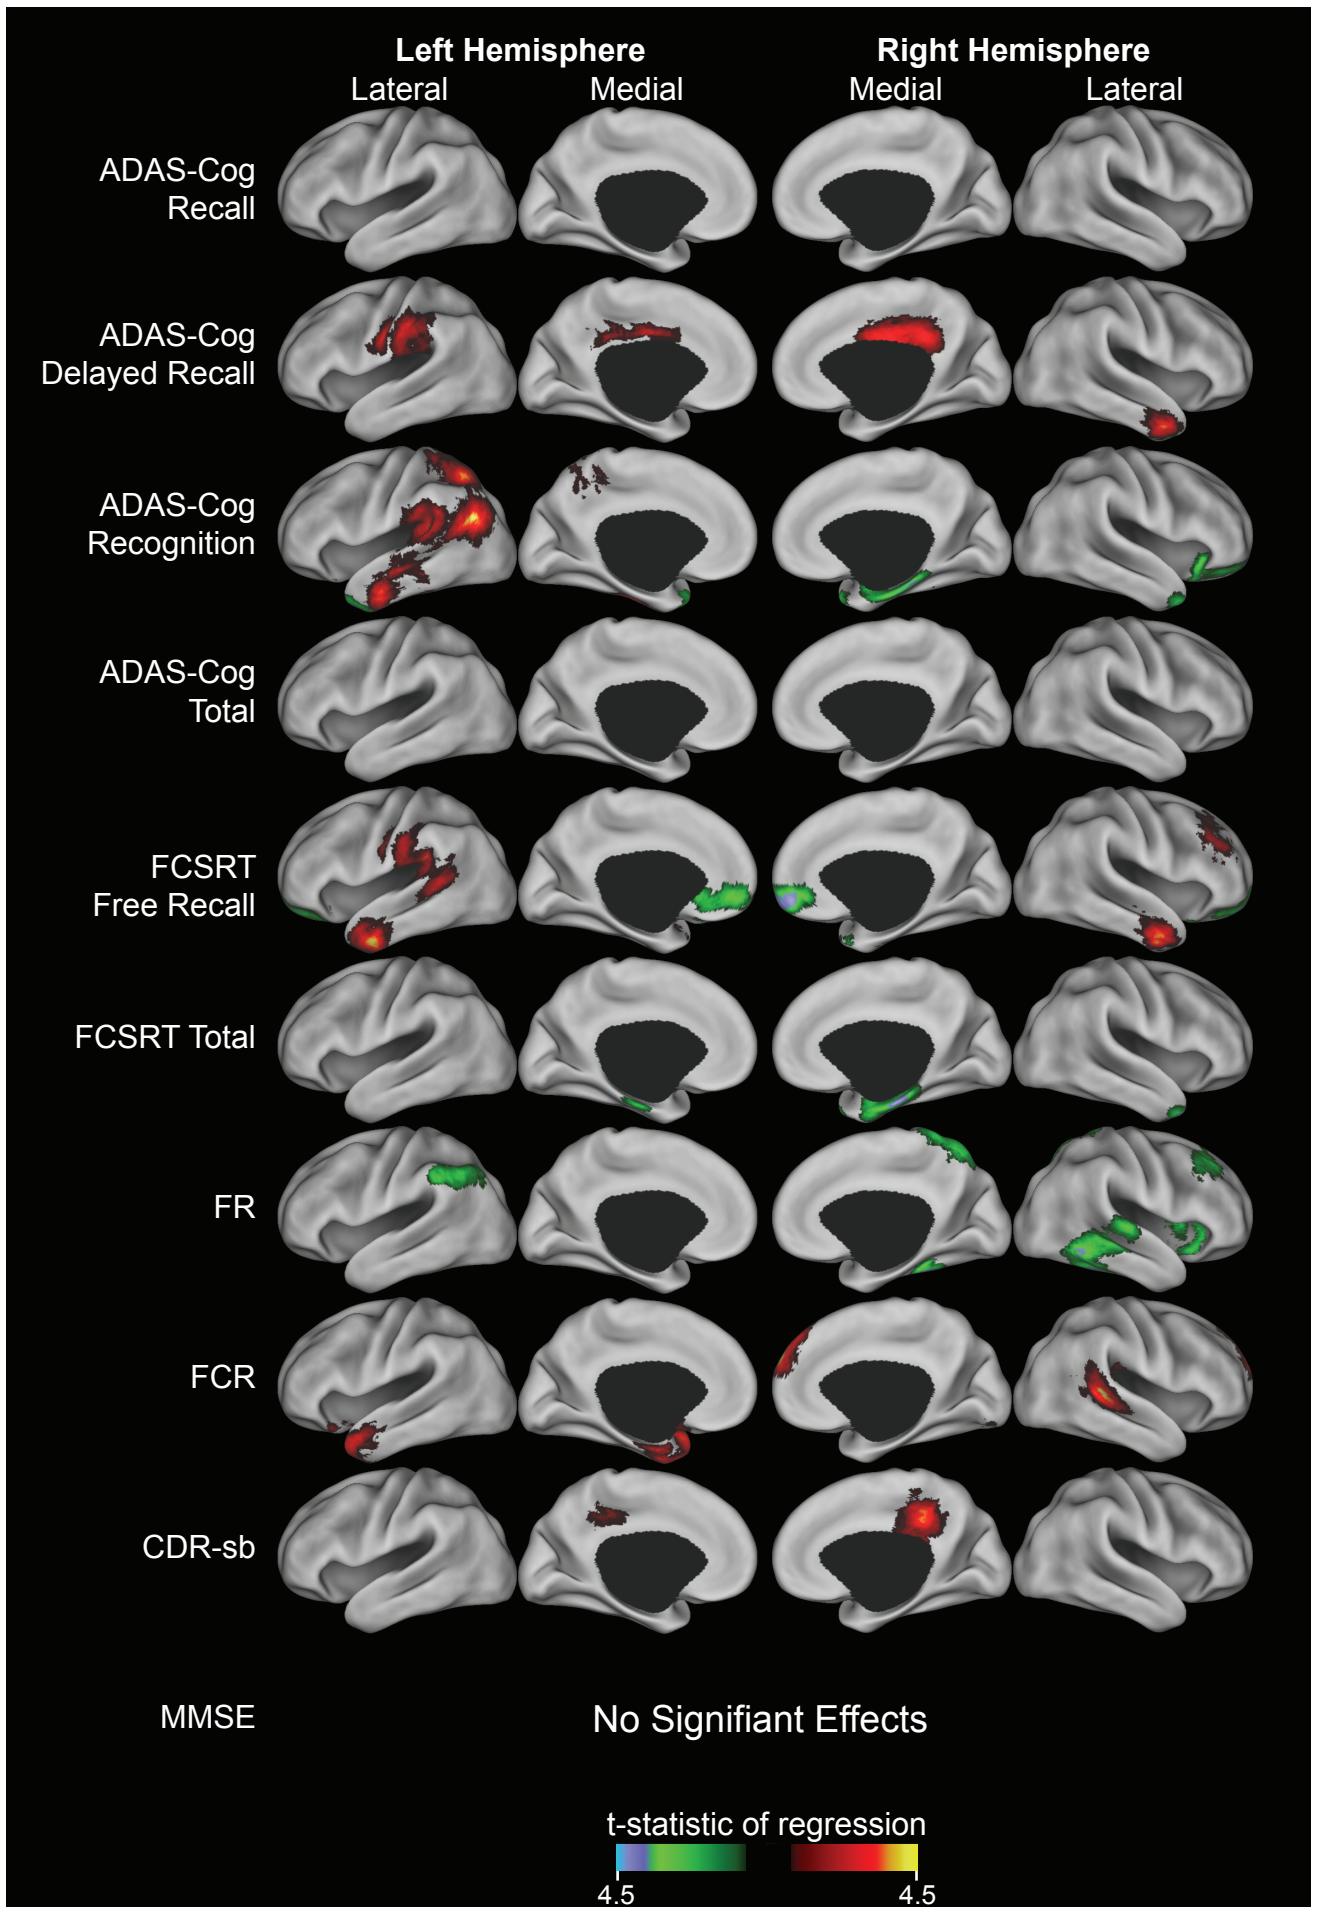

Supplement: NIHMS606442-supplement-3.pdf [file NIHMS606442-supplement-3.pdf]

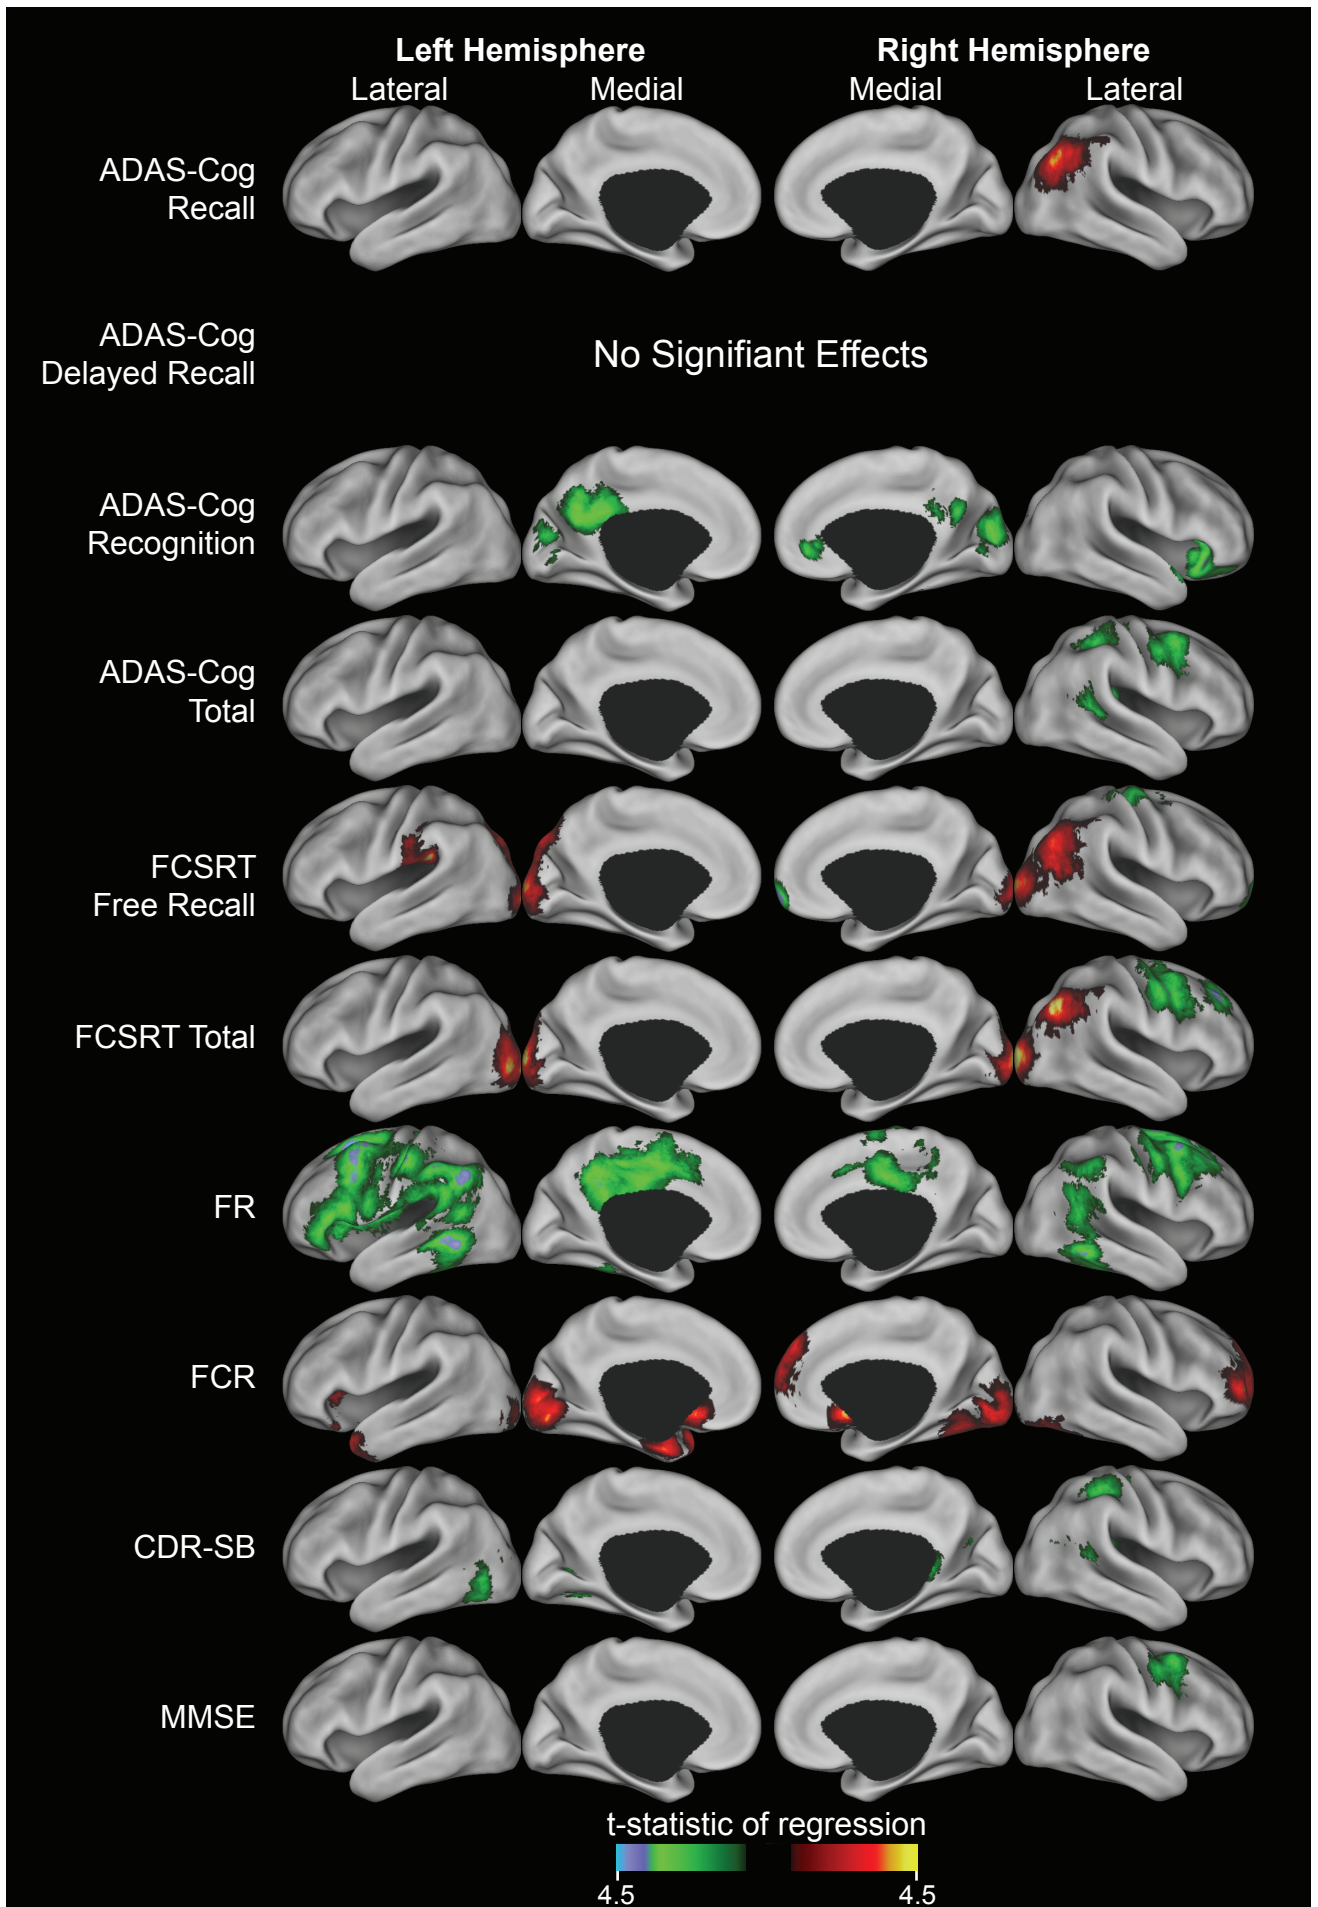

Supplement: NIHMS606442-supplement-4.pdf [file NIHMS606442-supplement-4.pdf]
